# Supplementary material for: Single cell spatial analysis reveals the topology of immunomodulatory purinergic signaling in glioblastoma
Source: PubMed Central journal article supplement (PMC9381513; doi:10.1038/s41467-022-32430-w), 2022-08-16
Supplement: 41467_2022_32430_MOESM1_ESM.pdf [file 41467_2022_32430_MOESM1_ESM.pdf]

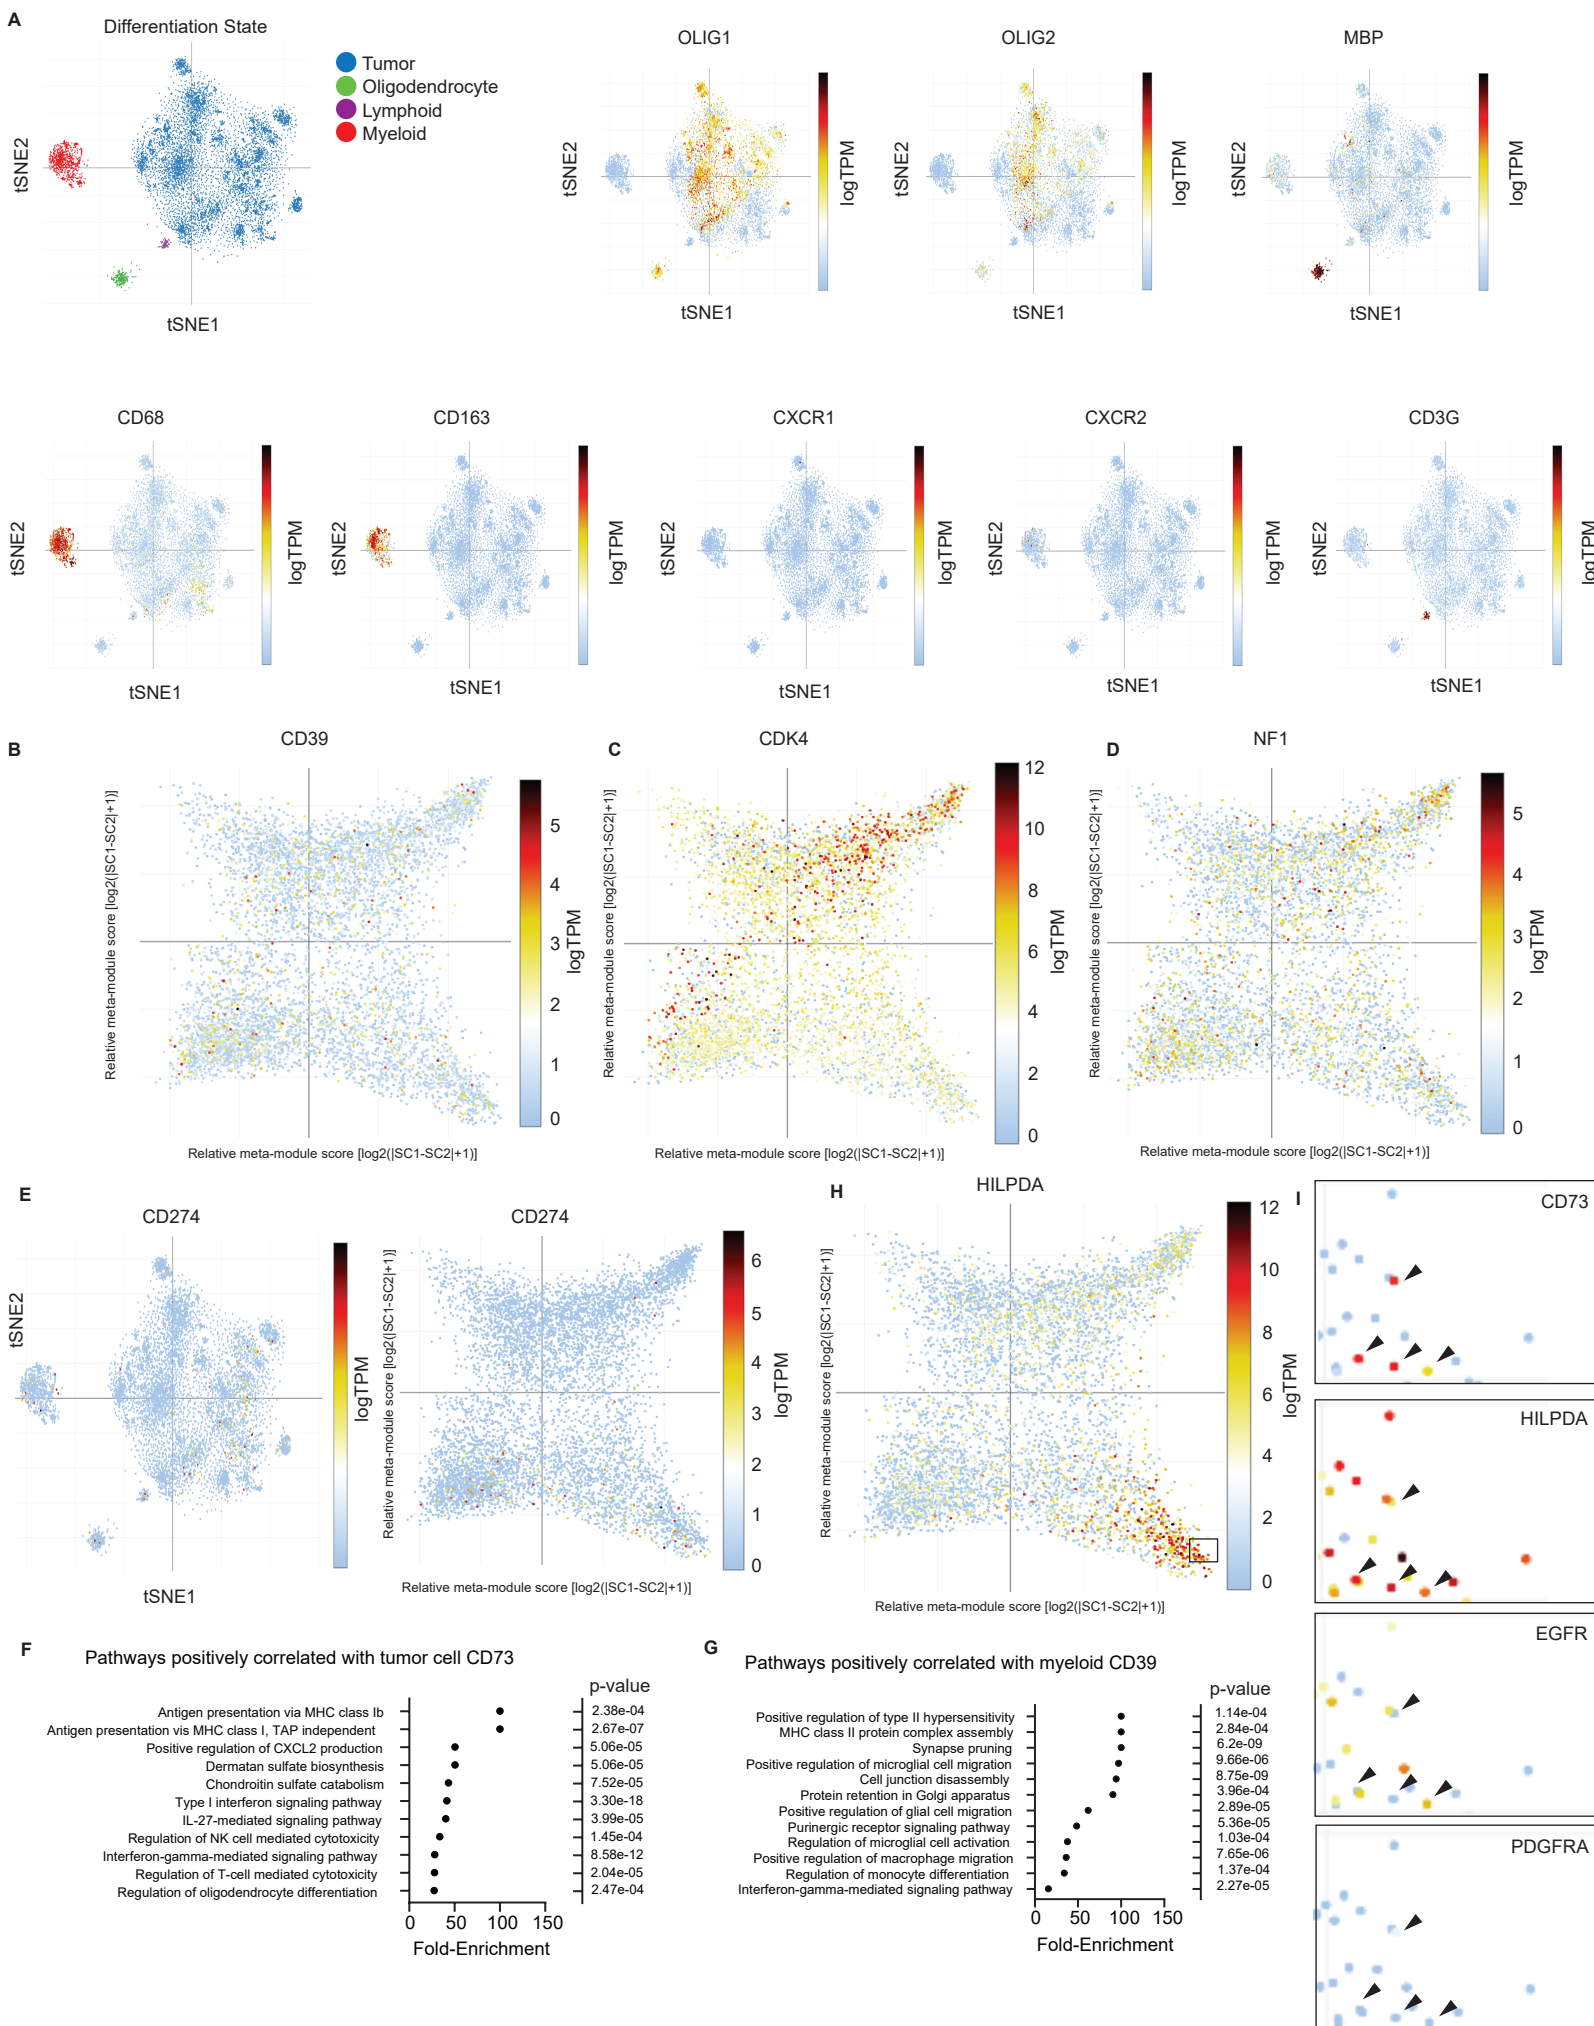

### Supplementary Figure 1.

(A) Evaluation of additional lineage-specific markers in single-cell RNA-sequencing data shows expression of *OLIG1*, *OLIG2*, and *MBP* in oligodendrocyte populations; *CD68*, *CD163* in myeloid populations; *CD3G* in lymphoid populations. *CXCR1* and *CXCR2* showed no significant neutrophil population. (B) Lineage analysis of tumor cells shows low-level expression of *CD39* in tumor cells, with no apparent enrichment in any lineage group. (C, D) *CDK4* showed appropriate localization to the NPC-like cluster, while *NF1* showed slightly lower signal in the MES-like cluster. (E) PD-L1 (*CD274*) was expressed only at very low levels in glioblastoma, with slight enrichment in the AC-like and MES-like clusters. (F) GSEA analysis of tumor cell populations showed that chemokine (*CXCL2*), major histocompatibility (MHC-I) and interferon signaling are the pathways most strongly correlated with high *CD73* expression (GSEA, Kolmogorov-Smirniov test, unpaired, one-sided). (G) GSEA analysis of myeloid cells showed that in addition to purinergic signaling, inflammatory pathways including MHC-II and interferon signaling, and those regulating microglial migration and activation are the most upregulated in cells with high *CD39* expression (GSEA, Kolmogorov-Smirniov test, unpaired, one-sided). (H) The hypoxia-responsive gene *HILPDA* was strongly expressed in the MES-like cluster, but not other lineages. (I) Close-inspection of rare single-cells with elevated *CD73* in the MES-like cluster showed co-localization with strong *HILPDA* expression.



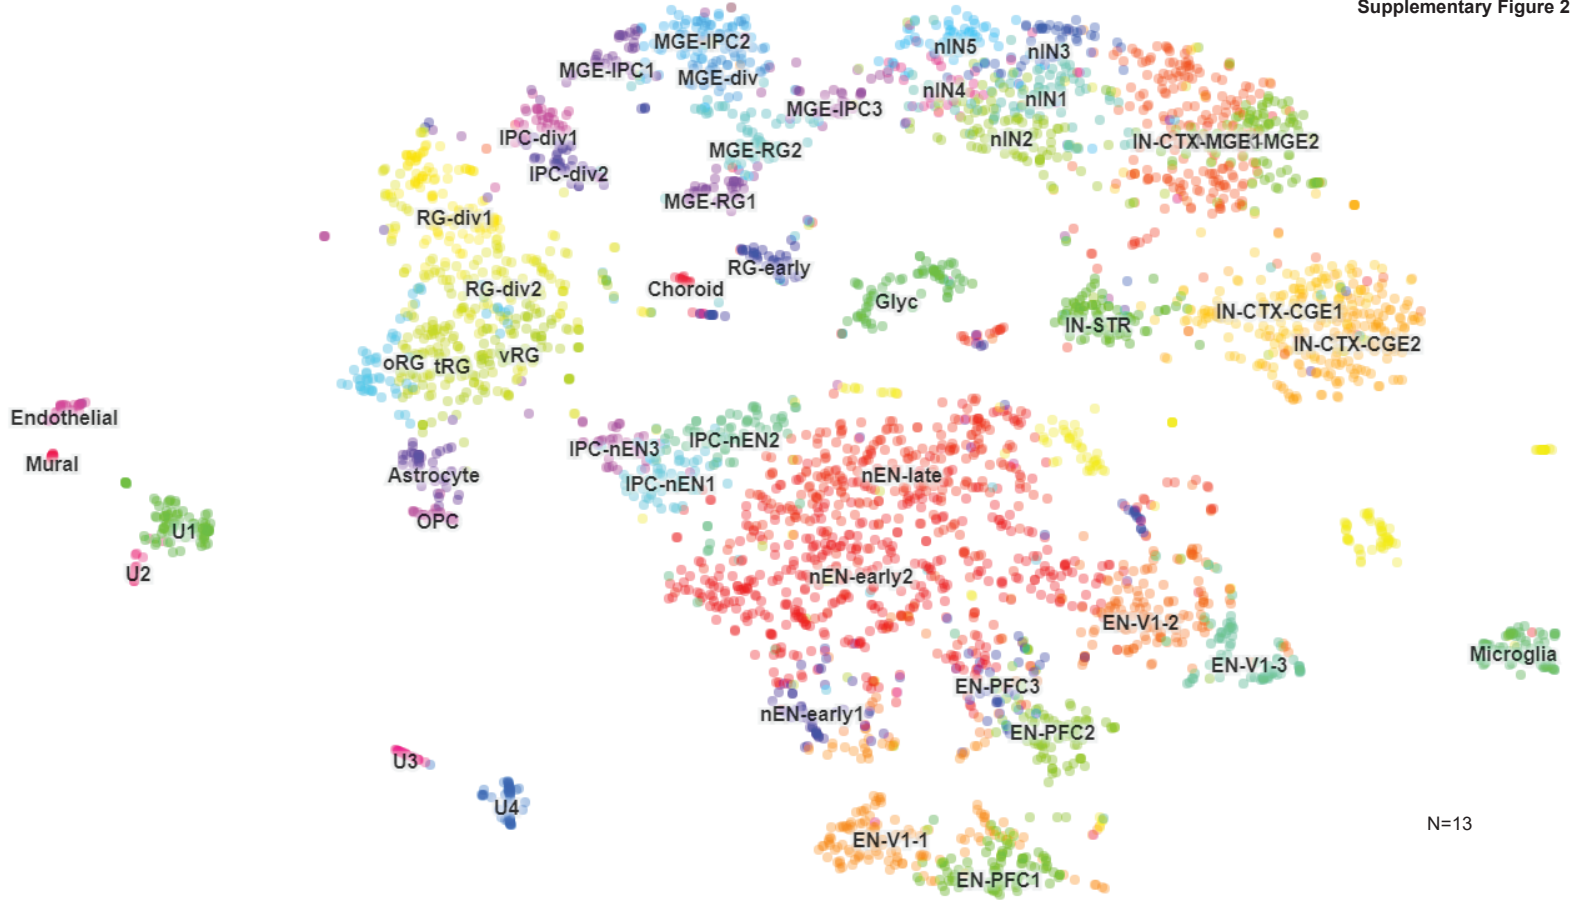

N=13

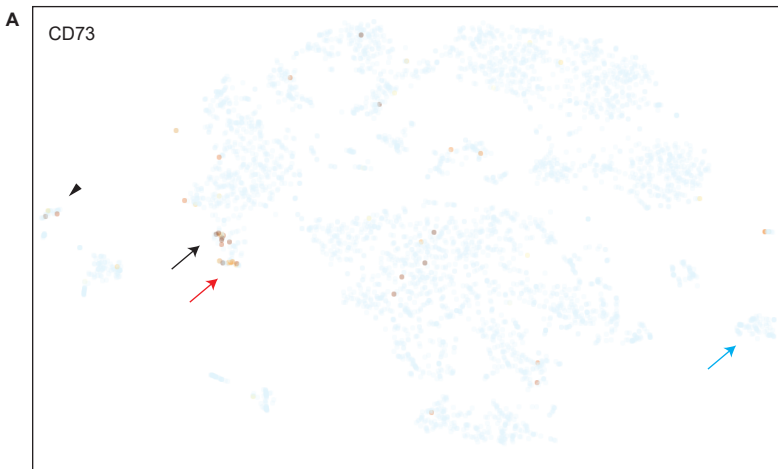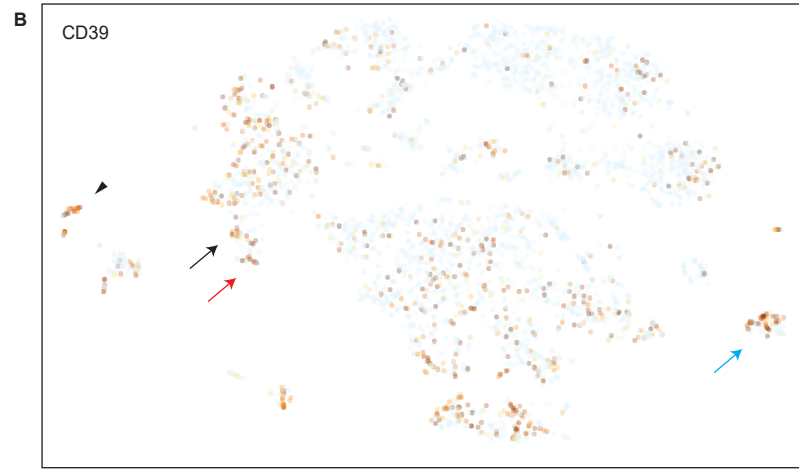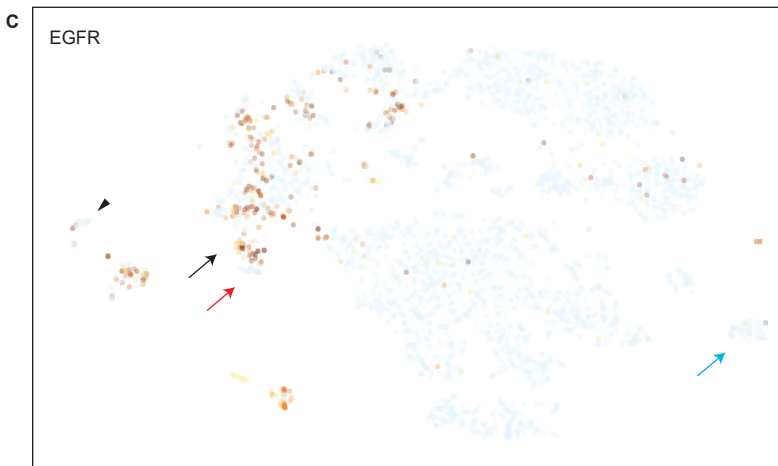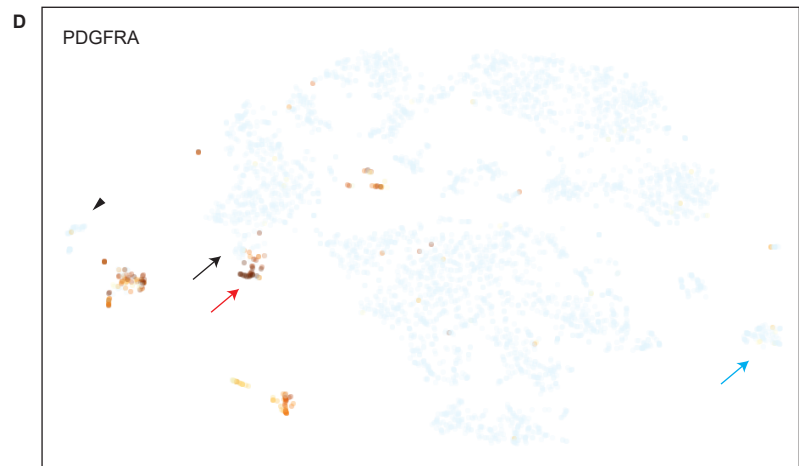

### Supplementary Figure 2.

(A) Analysis of non-neoplastic human developing cortex (UCSC Cell Browser) showed that *CD73* is predominantly enriched in developing astrocytes (black arrow) and OPC (red arrow). (B) *CD39* showed a broader expression distribution but was more strongly expressed by microglia (blue arrow) and endothelial cells (arrowhead). (C,D) *EGFR* was strongly expressed by developing astrocytes (black arrow) but not OPC (red arrow) while *PDGFRA* was enriched in OPC (red arrow) but not developing astrocyte (see <https://cells.ucsc.edu/?ds=cortex-dev> for further classification of cell subtypes).



### Supplementary Figure 3.

(A) Single-cell analysis FACS-sorted CD45-positive immune cells from 4 recurrent adult IDH-WT glioblastomas (Pombo Antunes et al.) (n=42,870), showed only very rare *CD73* expression (0.7% of cells), predominantly in TAM and monocytes. (B,C) In contrast to newly-diagnosed tumors, there is a greater number of *CD73*-high T and B cells in recurrent tumors. (D,E) *CD39* expression is present in all immune populations, though it is most enriched in TAM1 and TAM2 clusters. There is a slightly reduced overall proportion of *CD39*-positive immune cells in recurrent cases, likely due to an influx of *CD39*-negative T cells, though there is a new prominent regulatory T cell (Treg) cluster with strong *CD39* expression in recurrences compared to newly-diagnosed tumors. (F-H) TAM sub-group analysis showed low overall *CD73* expression, though hypoxic monocytic TAM clusters are most enriched for *CD73*. (I,J) Sub-group analysis of *CD39* expression showed broad expression in all TAM sub-groups, with the greatest enrichment in microglial TAM clusters. (K,L) *CD73* was not expressed in any dendritic cell population (0% of cells). (M) *CD39* expression was low in plasmacytoid and migratory dendritic cells, but broadly expressed by other dendritic cell sub-groups. (N-P) Single-cell RNA-sequencing analysis of an additional cohort of glioma-associated microglial cells (Sankowski et al.) showed minimal expression of *CD73* in all microglial sub-groups, while *CD39* expression was present in all sub-groups.

A

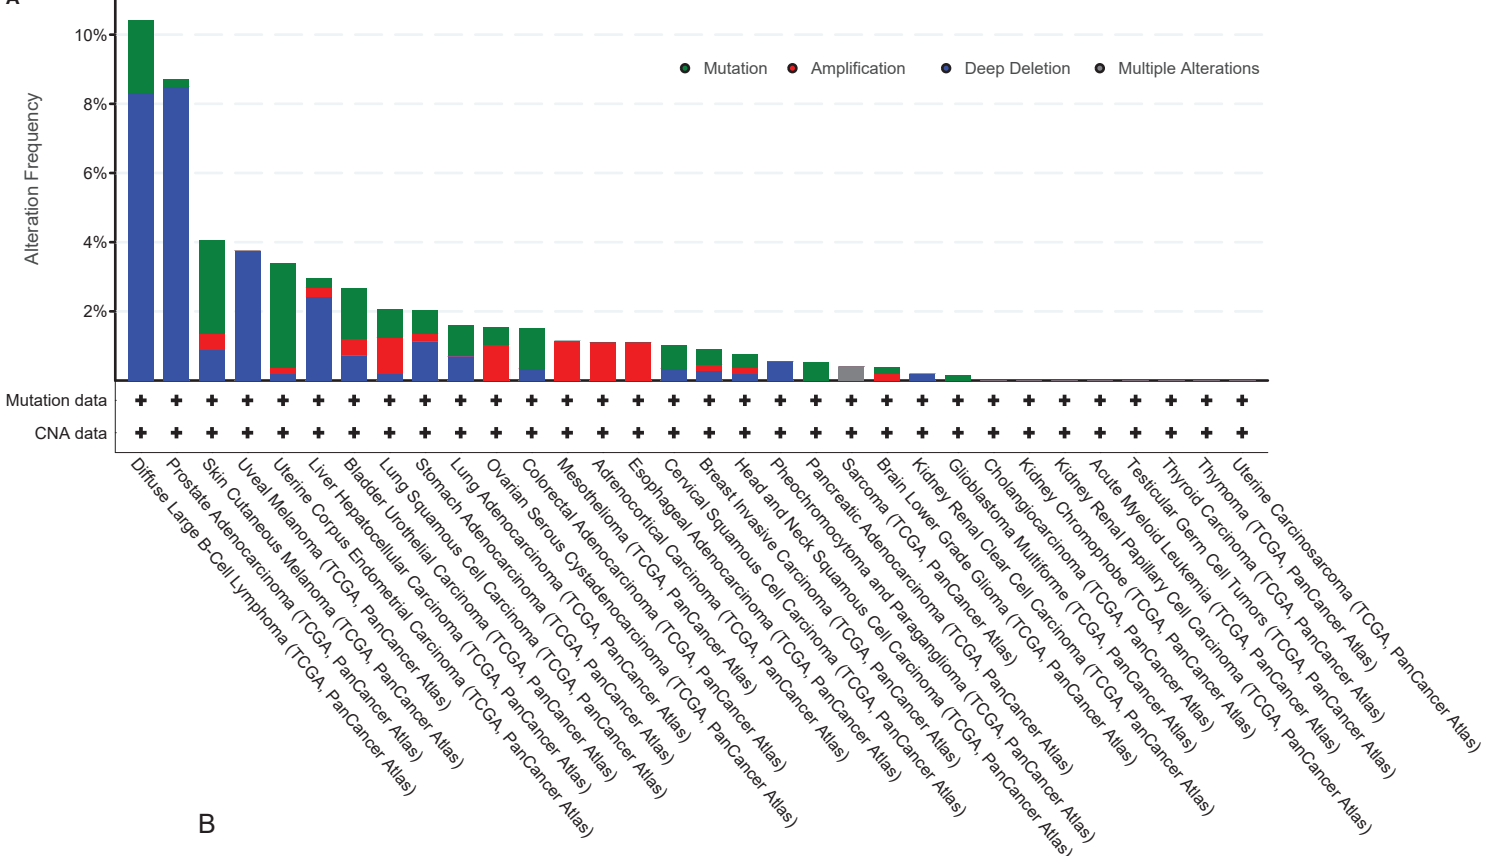

B

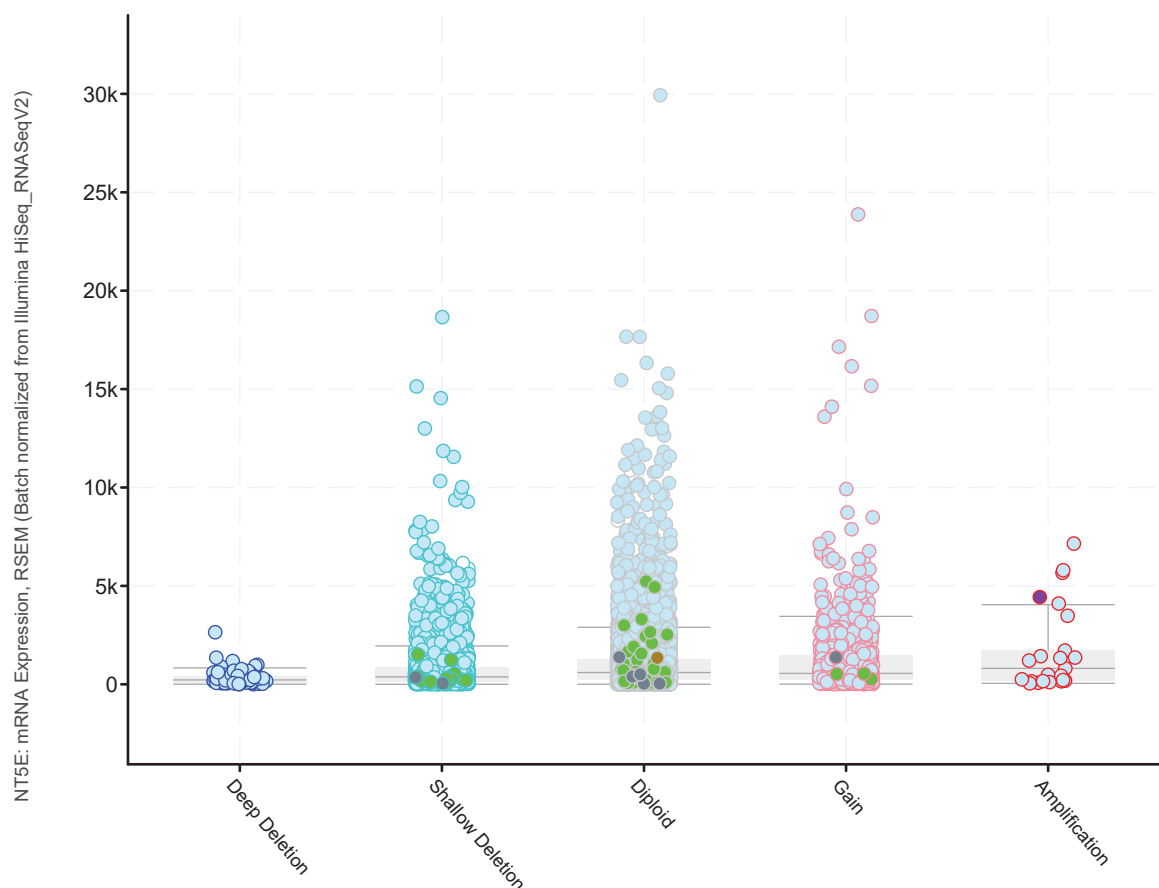

NT5E: Putative copy-number alterations from GISTIC

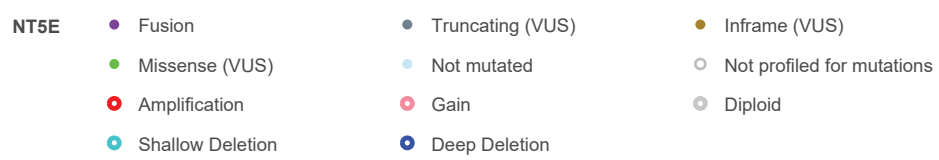



**Supplementary Figure 4.**

(**A**) *CD73* gene alterations are uncommon in cancer (TCGA Pan-Cancer Atlas, n=32 tumor types, 10,967 samples), and present in <1% of glioblastomas. (**B**) *CD73* mRNA expression levels are not significantly correlated with underlying alteration of the *CD73* gene in glioblastoma (n=145), with no elevation in expression in *CD73* amplified tumors.



### Supplementary Figure 5.

(A) Bulk mRNA expression was assessed in tumor tissue (n=10,967) from 32 cancer subtypes (TCGA) (see Supplementary Table S4 for detailed information including specimen counts and precise p-values for each comparison depicted in A-D). *CD39* exhibits significantly higher expression in glioblastoma than many cancer subtypes ( $p < 0.05$ , blue line, t-test, unpaired, two-sided, with Welch's correction). (B-D) Analysis of adenosine receptors shows that glioblastomas and diffuse gliomas demonstrate higher *ADORA1* and *ADORA3* expression than all other cancer subtypes ( $p < 0.0001$ ), and relatively high levels of *ADORA2B* compared to many cancers (t-test, unpaired, two-sided, with Welch's correction). *ADORA2A* expression is relatively less enriched in glioblastoma (Table S4, not shown). (Figure S5A-D use Tukey box-and-whisker plots with midline = median, box limits = Q1 (25<sup>th</sup> percentile)/Q3 (75<sup>th</sup> percentile), whiskers = 1.5 inter-quartile range (IQR), with individual tumor values also superimposed on the graph with relevant genotypic alterations noted in the color code).



A

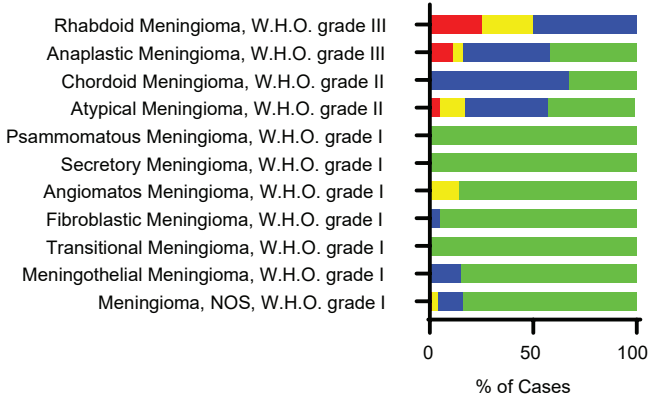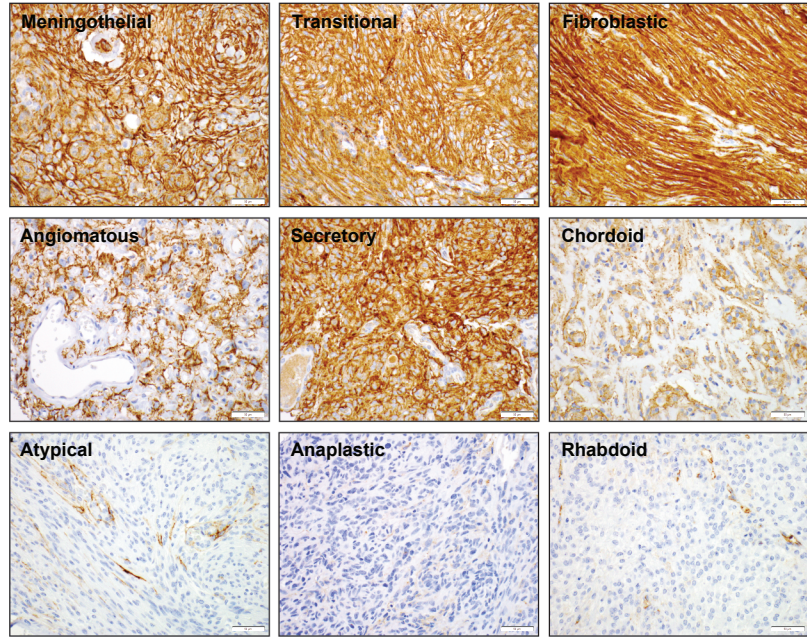

B

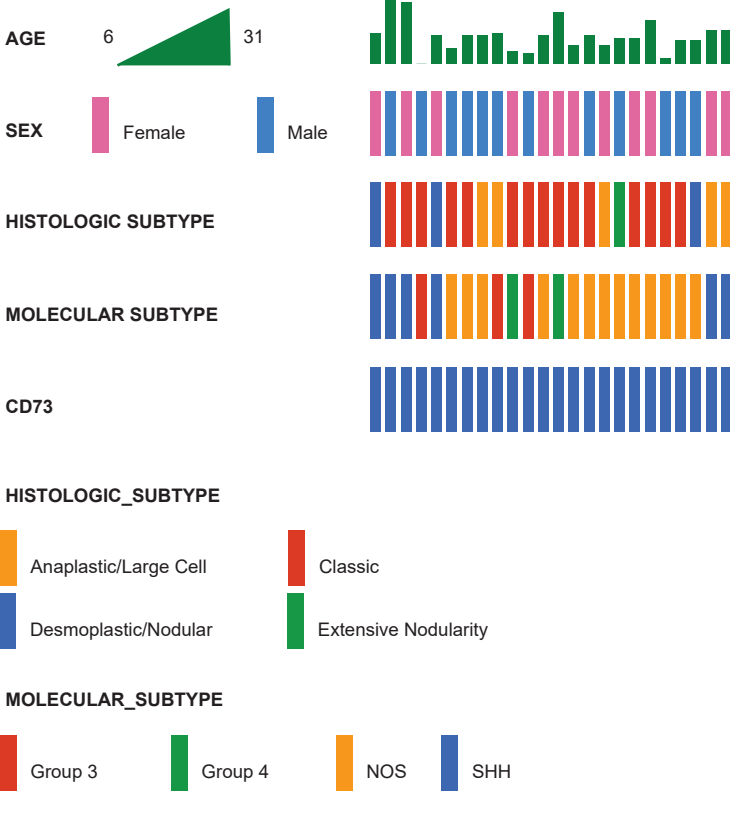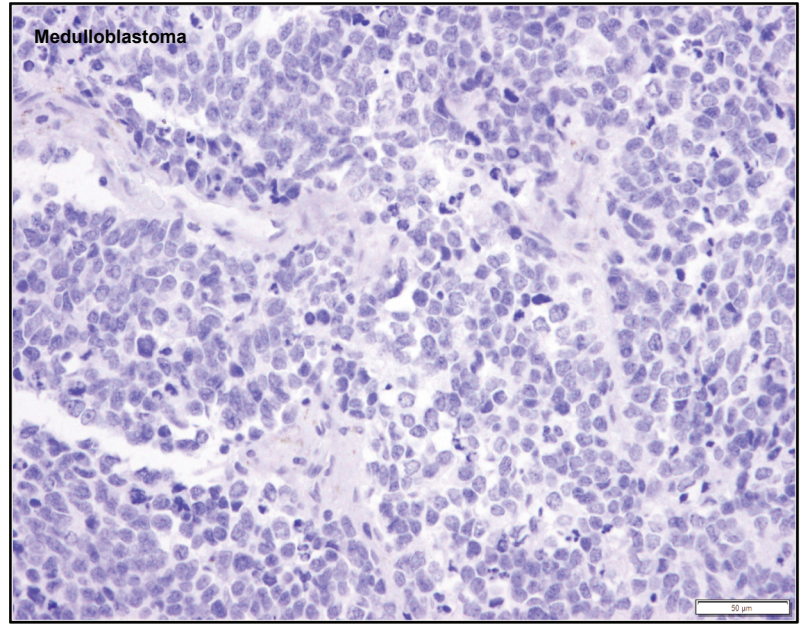

C

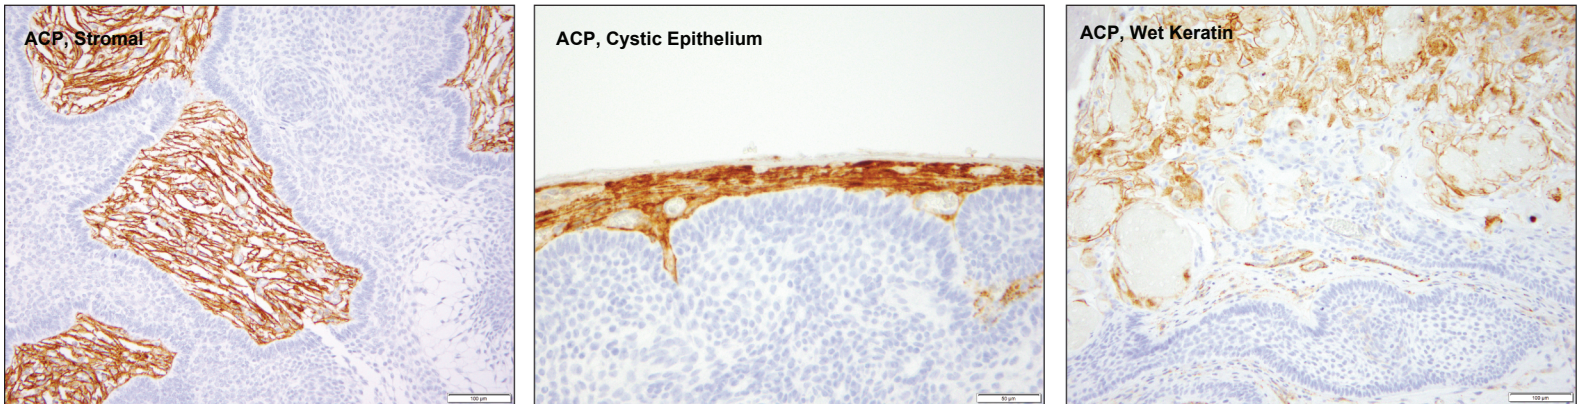

### **Supplementary Figure 6.**

(A) Extended immunohistochemistry analysis shows that W.H.O. grade 1 meningiomas exhibit consistently high CD73 expression in all histologic subtypes (each specimen stained once). Lower CD73 expression is observed in atypical and chordoid meningiomas (W.H.O. grade 2), with the lowest levels in high-grade anaplastic and rhabdoid meningiomas (W.H.O. grade 3); scalebars: 50µm. (B) Medulloblastomas exhibited no CD73 expression regardless of histologic or molecular subtype; scalebar: 50µm. (C) Adamantinomatous craniopharyngiomas exhibited regional variations in CD73 expression, with no expression in the basaloid, stellate reticular, or whorled tumor epithelium, but consistently strong expression in the fibrovascular stroma, keratinized cyst-lining epithelium, and regions of wet keratin. Representative staining of specimens from each tumor subtype are shown; each immunohistochemistry staining experiment was performed once; scalebars: 100µm.



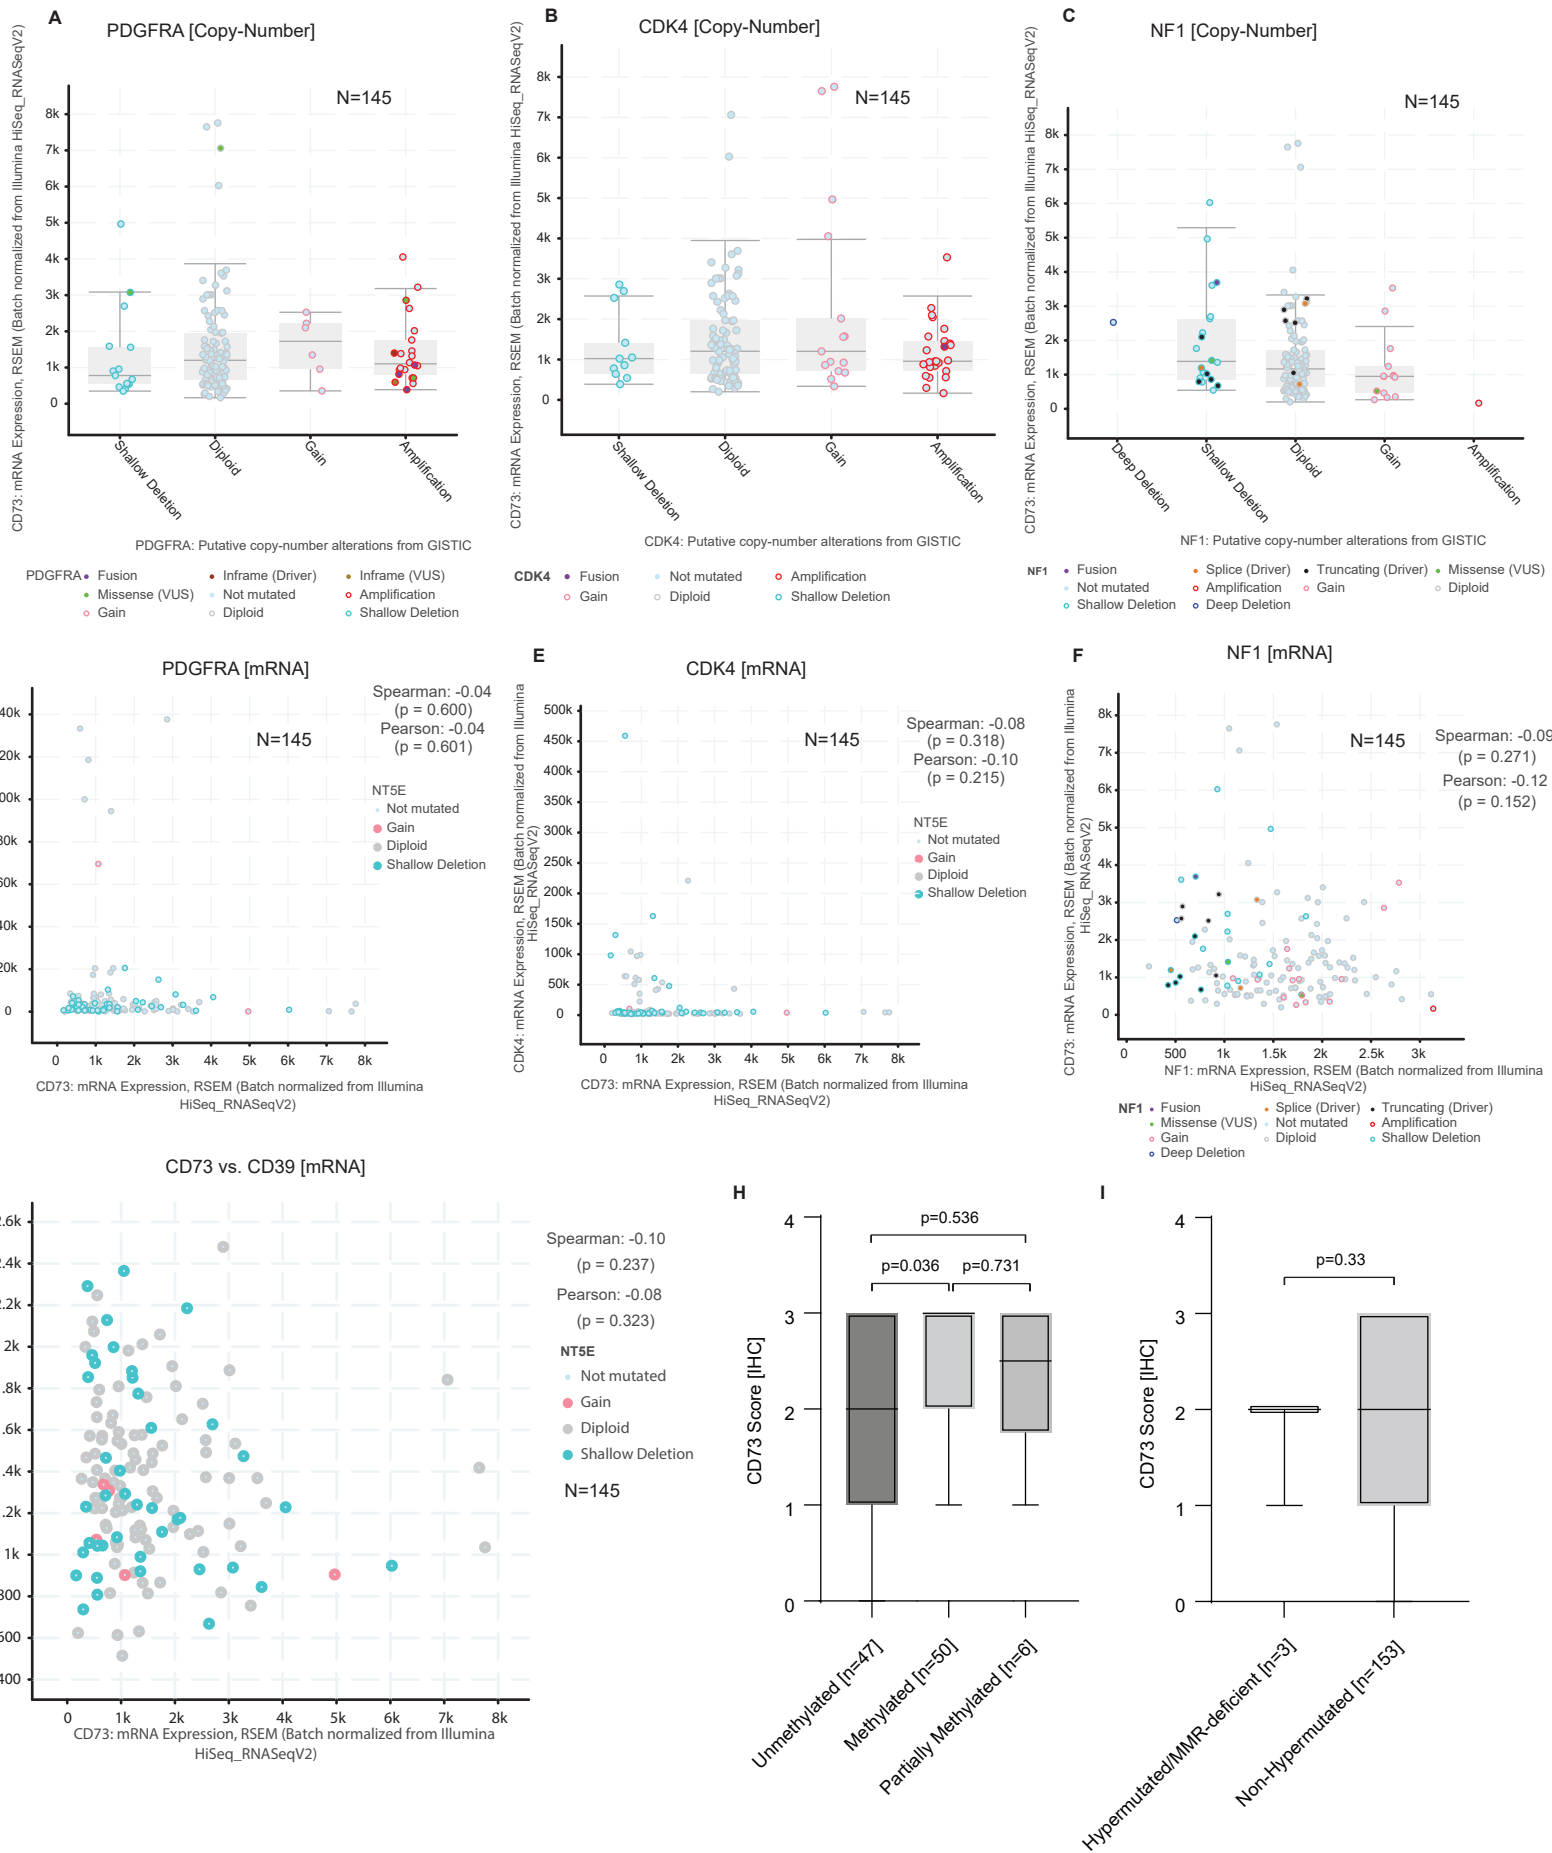

### Supplementary Figure 7.

(A-C) Bulk mRNA analysis of human glioblastoma specimens (TCGA, n=145 tumors) shows no evident correlation between *CD73* expression level and chromosomal alterations in *PDGFRA*, *CDK4*, or *NF1*. (D-F) There was no significant correlation between mRNA expression of *CD73* and *PDGFRA* ( $p=0.60$ , Pearson correlation test, unpaired, two-sided), *CDK4* ( $p=0.22$ , Pearson correlation test, unpaired, two-sided), or *NF1* ( $p=0.15$ , Pearson correlation test, unpaired, two-sided). (G) There was no significant correlation between tumor *CD73* and *CD39* levels ( $p=0.32$ , Pearson correlation test, unpaired, two-sided). (H) Mean CD73 IHC expression was slightly lower in tumors with an unmethylated *MGMT* promoter (n=47 tumors), compared to those with methylation of this locus (n=50 tumors) ( $p=0.038$ , t-test, unpaired, two-sided). (I) There was no significant difference in CD73 IHC expression in recurrent/residual glioblastomas with hypermutation and mismatch-repair deficiency (n=3 tumors) from those without (n=153 tumors) ( $p=0.33$ , t-test, unpaired, two-sided), though the number of hypermutated tumors in the cohort was small. (Figures SA-C, H, and I use Tukey box-and-whisker plots with midline = median, box limits = Q1 (25<sup>th</sup> percentile)/Q3 (75<sup>th</sup> percentile), whiskers = 1.5 inter-quartile range (IQR), dots = outliers (>1.5IQR)).

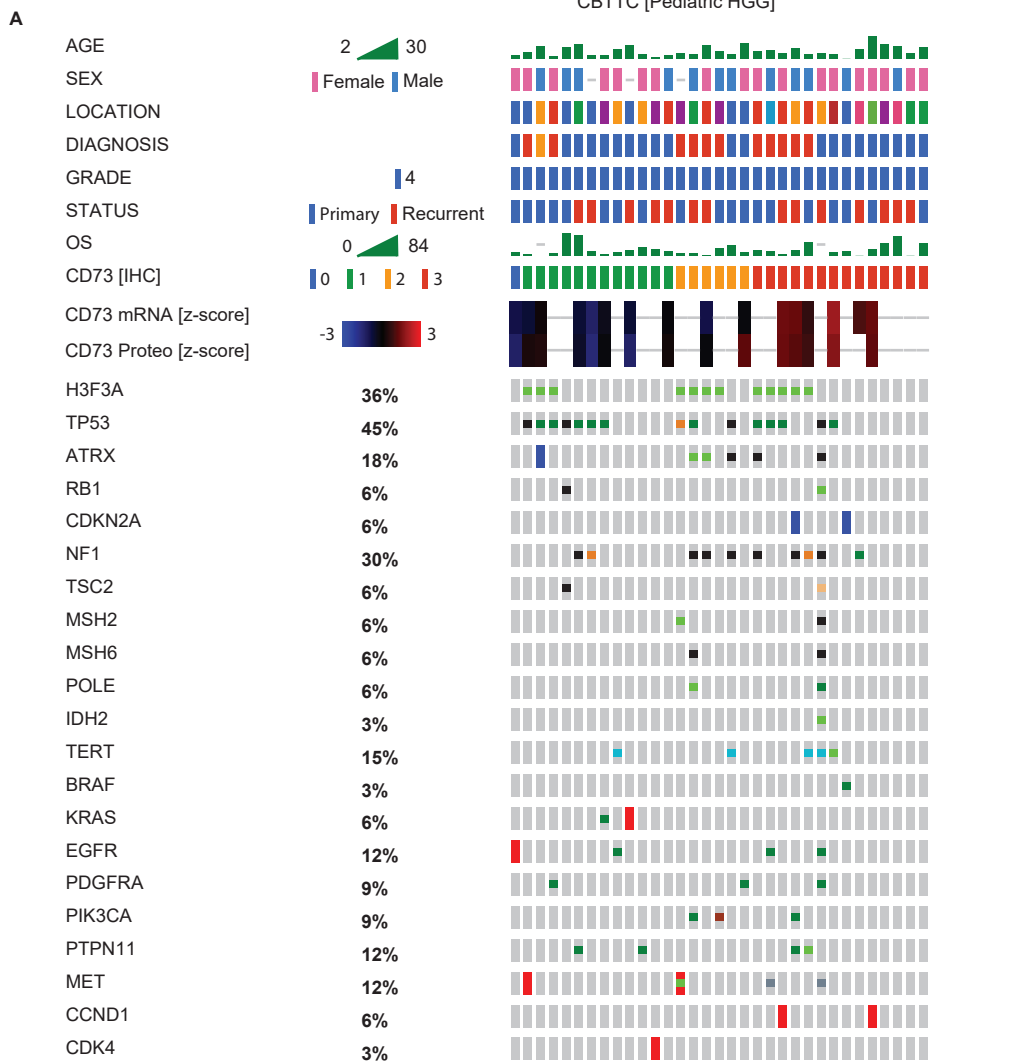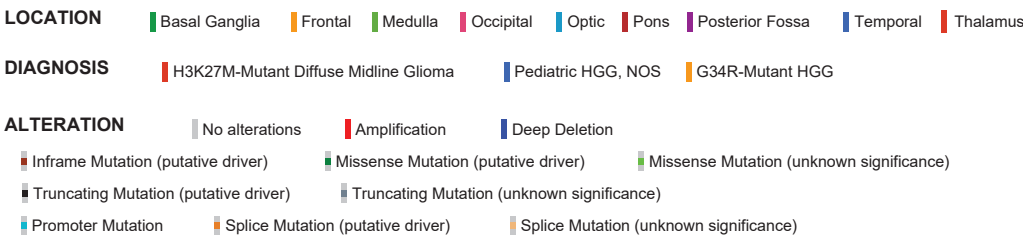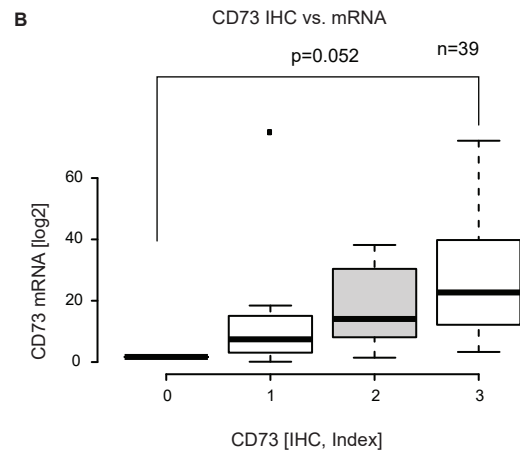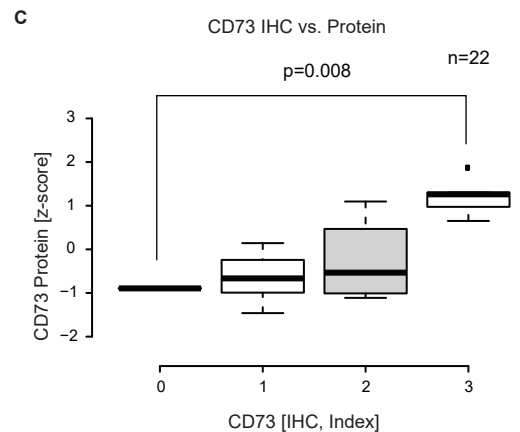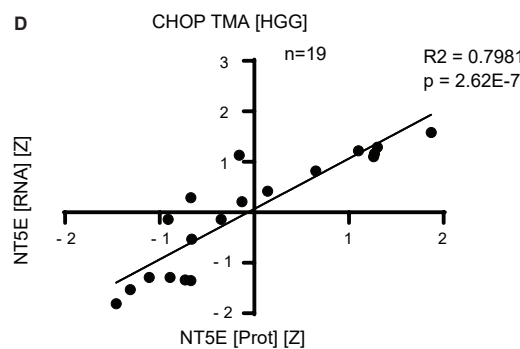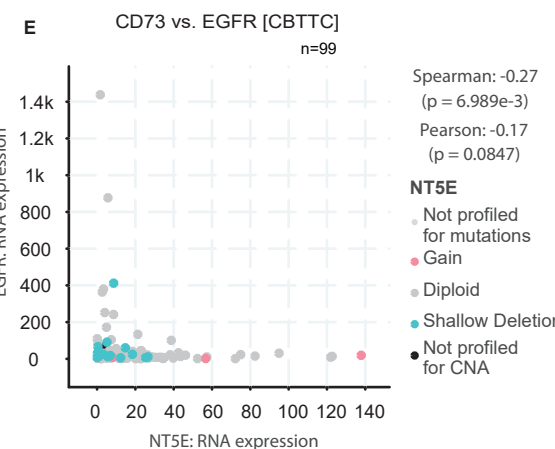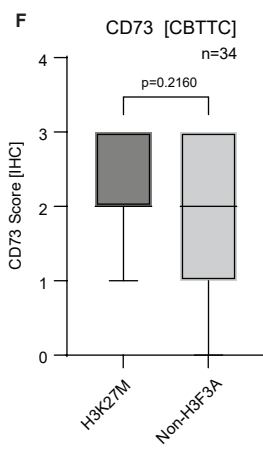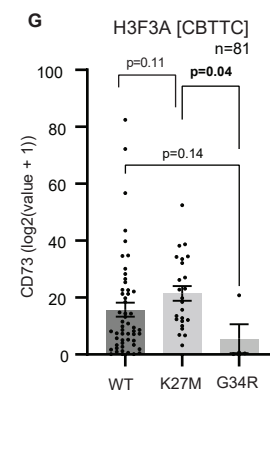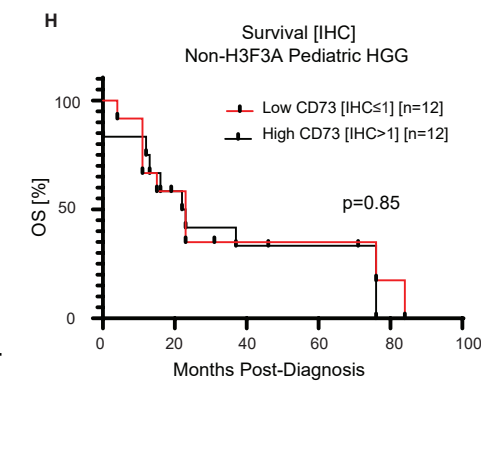

### Supplementary Figure 8.

(A) Sub-group analysis of a cohort of 34 pediatric HGG from the Children's Brain Tumor Network (CBTN) dataset with curated clinical and molecular data showed a wide variety of molecular alterations, with fewer alterations per case than adult tumors, consistent with the typical genomic diversity of pediatric gliomas. H3K27M-mutant diffuse midline gliomas and pediatric HGG frequently exhibit high expression of CD73 (IHC). (B) CD73 IHC score showed a trend toward correlation with *CD73* mRNA on evaluation of all HGG with mRNA data (n=39), but this did not reach statistical significance in all dataset (p=0.052, Kruskal-Wallis test, unpaired, two-sided). (C) CD73 IHC score was strongly correlated with CD73 protein levels by mass spectrometry (p=0.008, n=22, Kruskal-Wallis test, unpaired, two-sided). (D) There was a strong correlation between CD73 mRNA and protein levels in tumors in which both datasets were available (p=2.62e-7, n=19, t-test, unpaired, two-sided). (E) Bulk mRNA sequencing from the full CBTTTC dataset (n=99 tumors) showed a negative correlation between *CD73* and *EGFR* levels (p=0.08, Pearson correlation test, unpaired, two-sided). (F) Comparison of H3K27M-mutant diffuse midline glioma and non-H3F3A-mutated pediatric HGG showed no significant difference in CD73 expression, with both exhibiting high mean CD73 (n=34, p=0.20, t-test, unpaired, two-sided); (G) however, H3G34R-mutant hemispheric gliomas exhibited significantly lower levels of *CD73* (n=81 total tumors, p=0.04, t-test, unpaired, two-sided; column plot, mean±S.E.M.). (H) Unlike adult IDH-WT glioblastoma, non-H3F3A-mutated pediatric HGG showed no difference in survival between cases with high *CD73* (top 50% of expression) and low *CD73* (bottom 50% of expression) (p=0.85, Mantel-Cox log-rank). (Figure S8B,C,F use Tukey box-and-whisker plots with midline = median, box limits = Q1(25<sup>th</sup> percentile)/Q3 (75<sup>th</sup> percentile), whiskers = 1.5 interquartile range (IQR), dots = outliers(>1.5IQR))



CD73

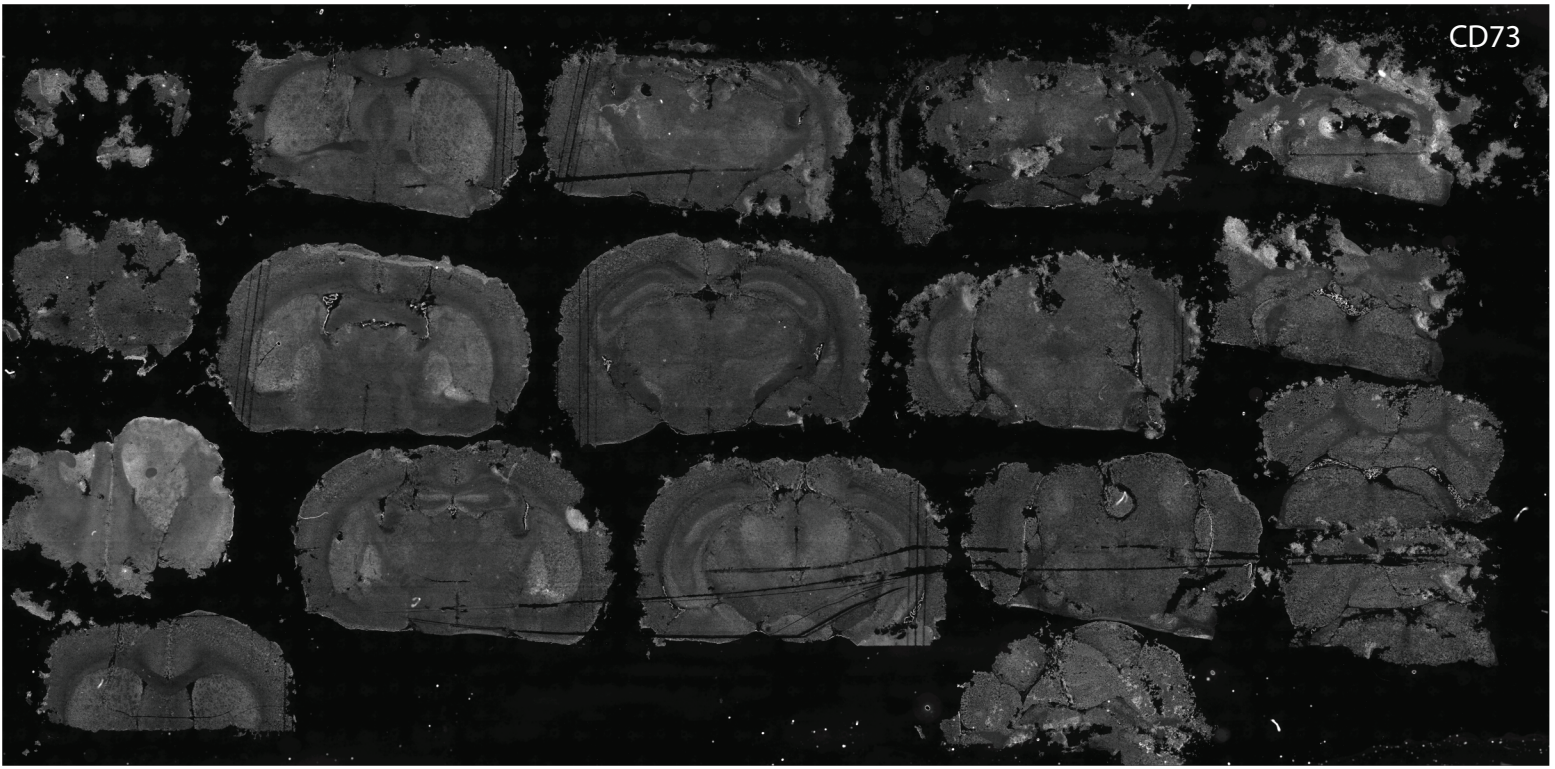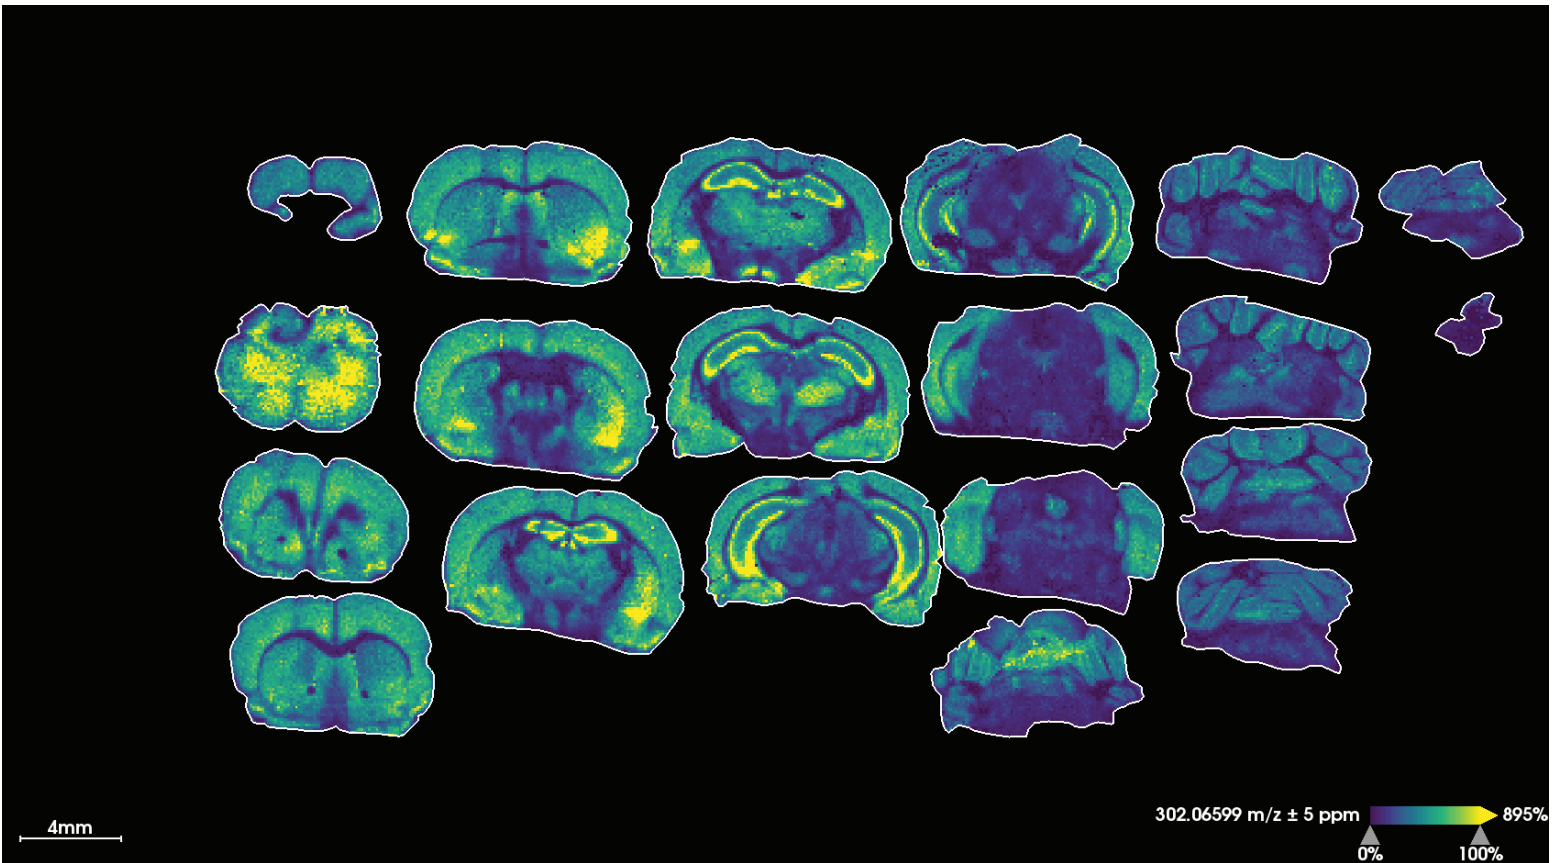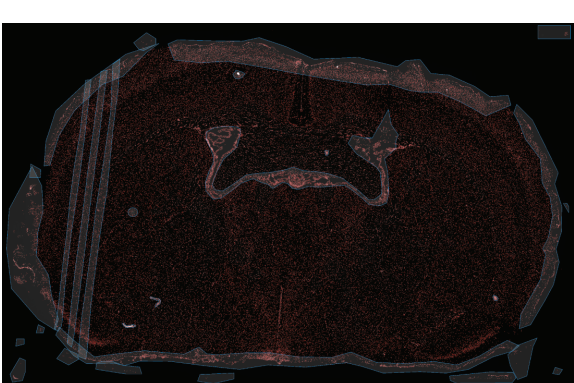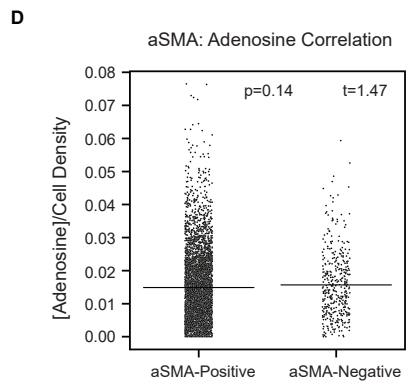



### **Supplementary Figure 9.**

(A) CD73 immunofluorescence in serial coronally sectioned whole-mount mouse brain showed enrichment of CD73 protein in the basal ganglia, with weaker expression in the cerebral and cerebellar cortex. There was minimal expression in the central white matter tracts and brainstem. (B) Spatially-resolved mass-spectrometry imaging showed a similar distribution of adenosine, with enrichment predominantly in the basal ganglia, with somewhat weaker signal in the cortex and minimal levels in the white matter tracts and brainstem; scale bar, 4mm. (C) During registration and processing of CD73 immunofluorescence and adenosine imaging, tissue tears and artifacts were identified, segmented, and removed from analysis to improve signal-to-noise. (D) While there was a strong spatial correlation between CD73 and adenosine levels, no such correlation was present for  $\alpha$ SMA, which labels vascular smooth muscle ( $p=0.14$ ,  $t=1.47$ , Tukey's HSD, unpaired, one-sided).

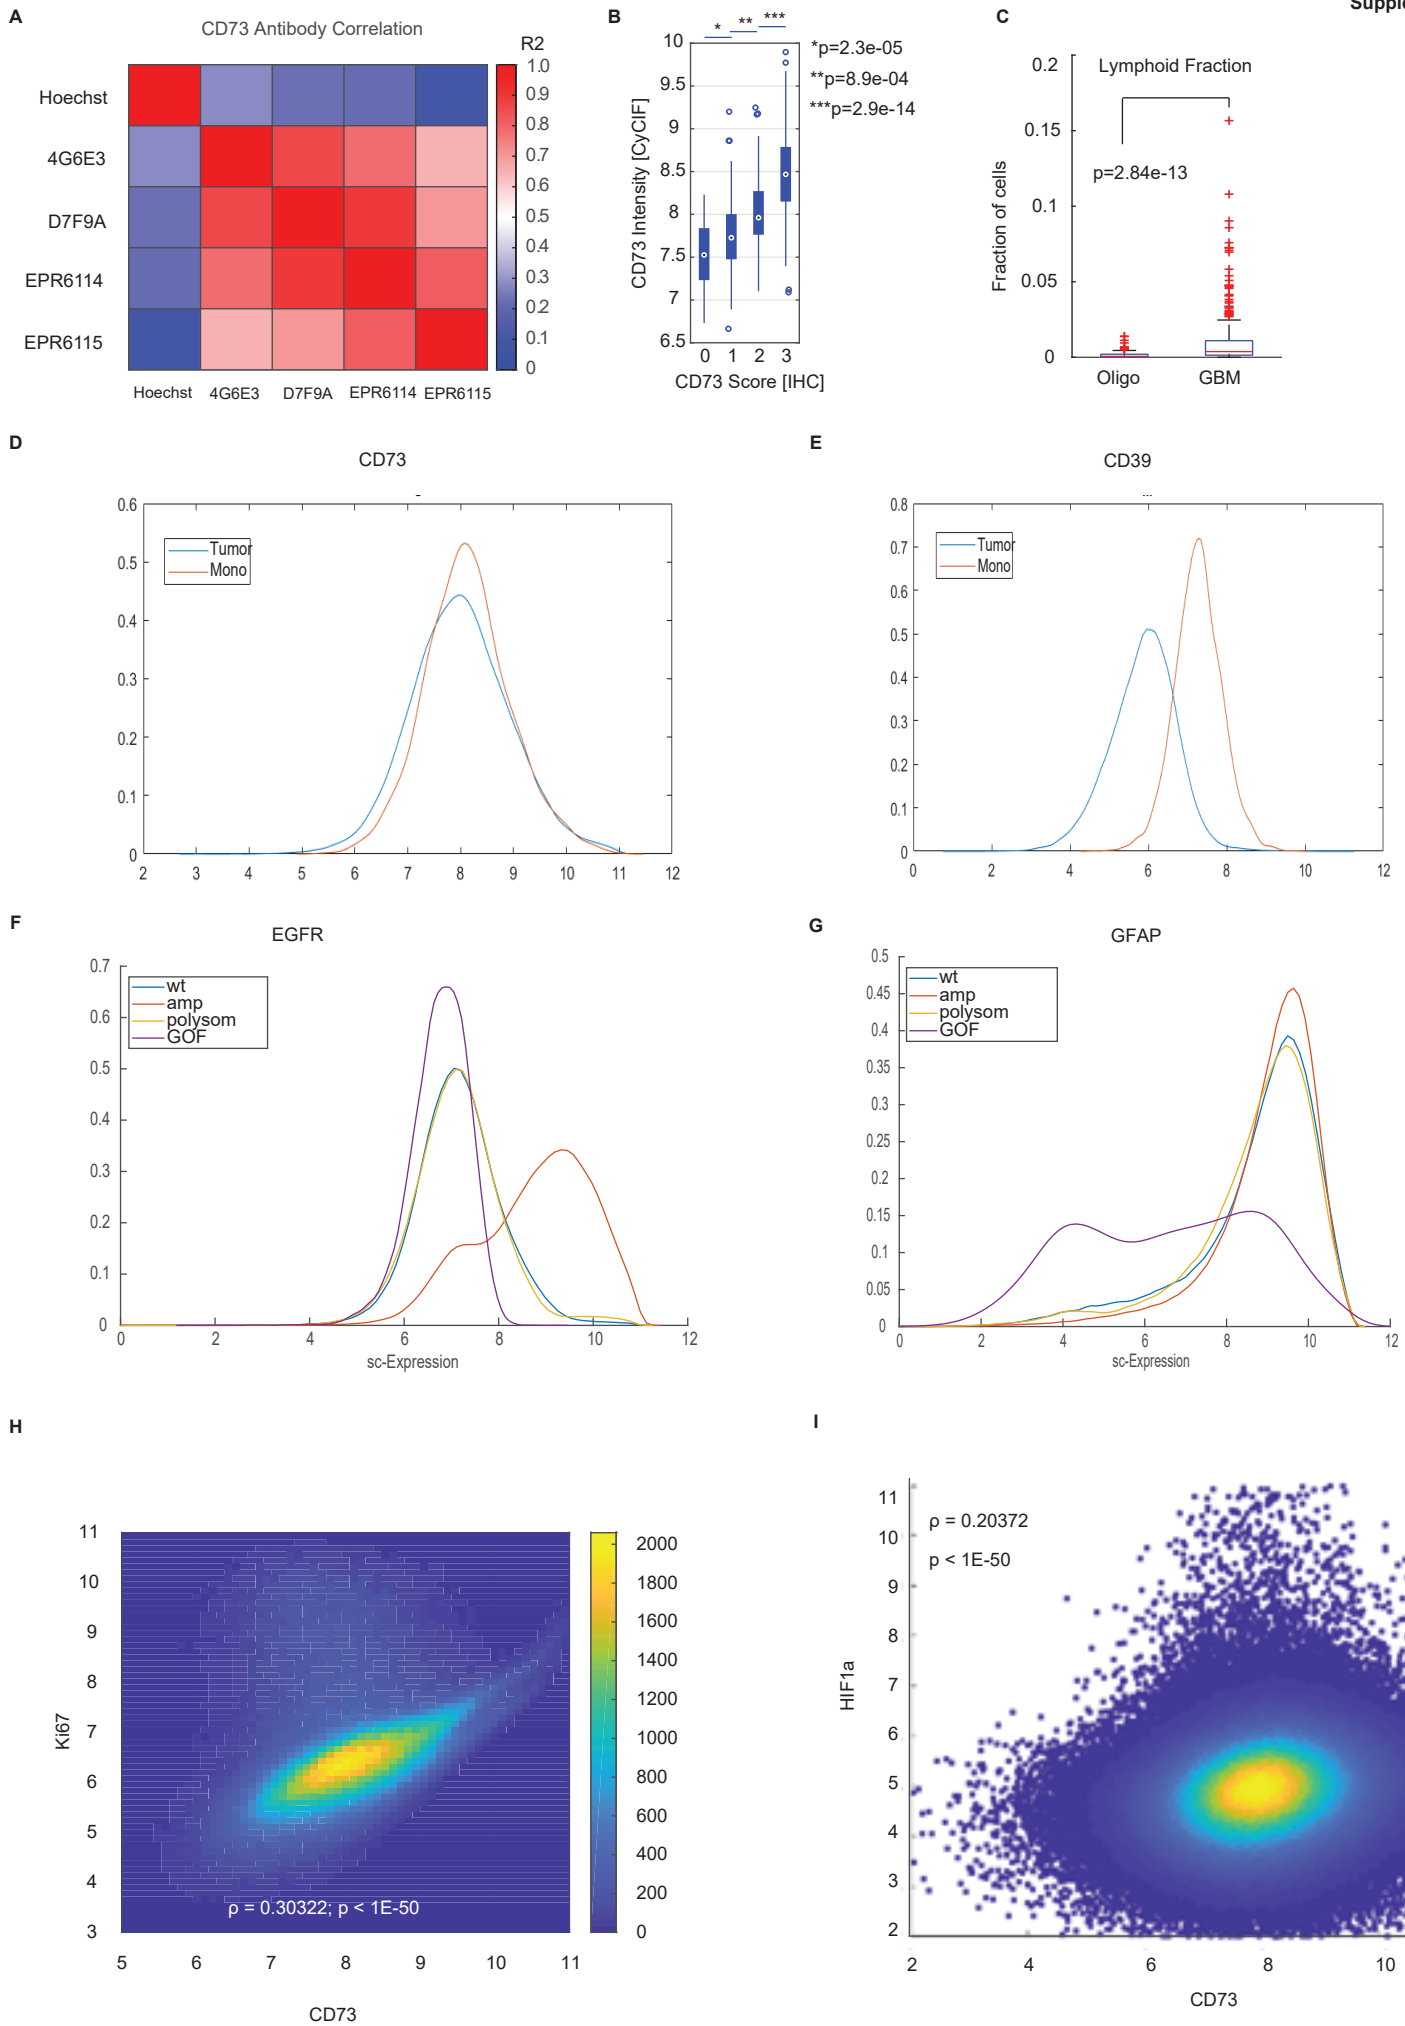

### Supplementary Figure 10.

(A) Cyclic immunofluorescence was used to correlate CD73 signal across all 172 IDH-WT glioblastoma samples using multiple CD73 antibody clones, showing strong pixel-level correlation between all clones, but not unrelated markers such as nuclear Hoechst. (B) There was an excellent correlation between CD73 IHC index score (as shown in Fig. 4), and mean core-level tumor cell CD73 intensity levels quantitatively measured by CyCIF (n=172 tumors, pairwise comparisons performed by t-tests, unpaired, two-sided). (C) Single-cell immune profiling of cells from the 172 IDH-WT CyCIF dataset showed that lymphoid cells are uncommon in glioblastoma, often comprising <5% of cells. Lymphoid populations are even less common in low grade oligodendrogliomas (n=14) analyzed in this dataset (p=2.84e-13, Wilcoxon rank sum test, unpaired, two-sided). (D) CD73 expression is present in both tumor and myeloid (mono) cells in the CyCIF IDH-WT dataset at similar levels, though the number of CD73-positive tumor cells is greater (Fig. 7). (E) CD39 is much more strongly expressed by myeloid (mono) populations than tumor cells in IDH-WT Glioblastoma. (F-G) Single-cell analysis of functional markers in IDH-WT glioblastoma (n=172) showed that CD73 levels are enriched in tumors with underlying EGFR amplification, and associates with high levels of GFAP. (H,I) Single-cell analysis showed that CD73 is positively correlated with the proliferation marker ki-67/MIB-1 (p<1e-50, t-test on Z-transformed Pearson correlation, unpaired, two-sided), and HIF1A (p<1e-50, t-test on Z-transformed Pearson correlation, unpaired, two-sided). (Figures S10B and S10C use Tukey box-and-whisker plots with midpoint = median, box limits = Q1(25<sup>th</sup> percentile)/Q3 (75<sup>th</sup> percentile), whiskers = 1.5 inter-quartile range (IQR), dots = outliers(>1.5IQR))

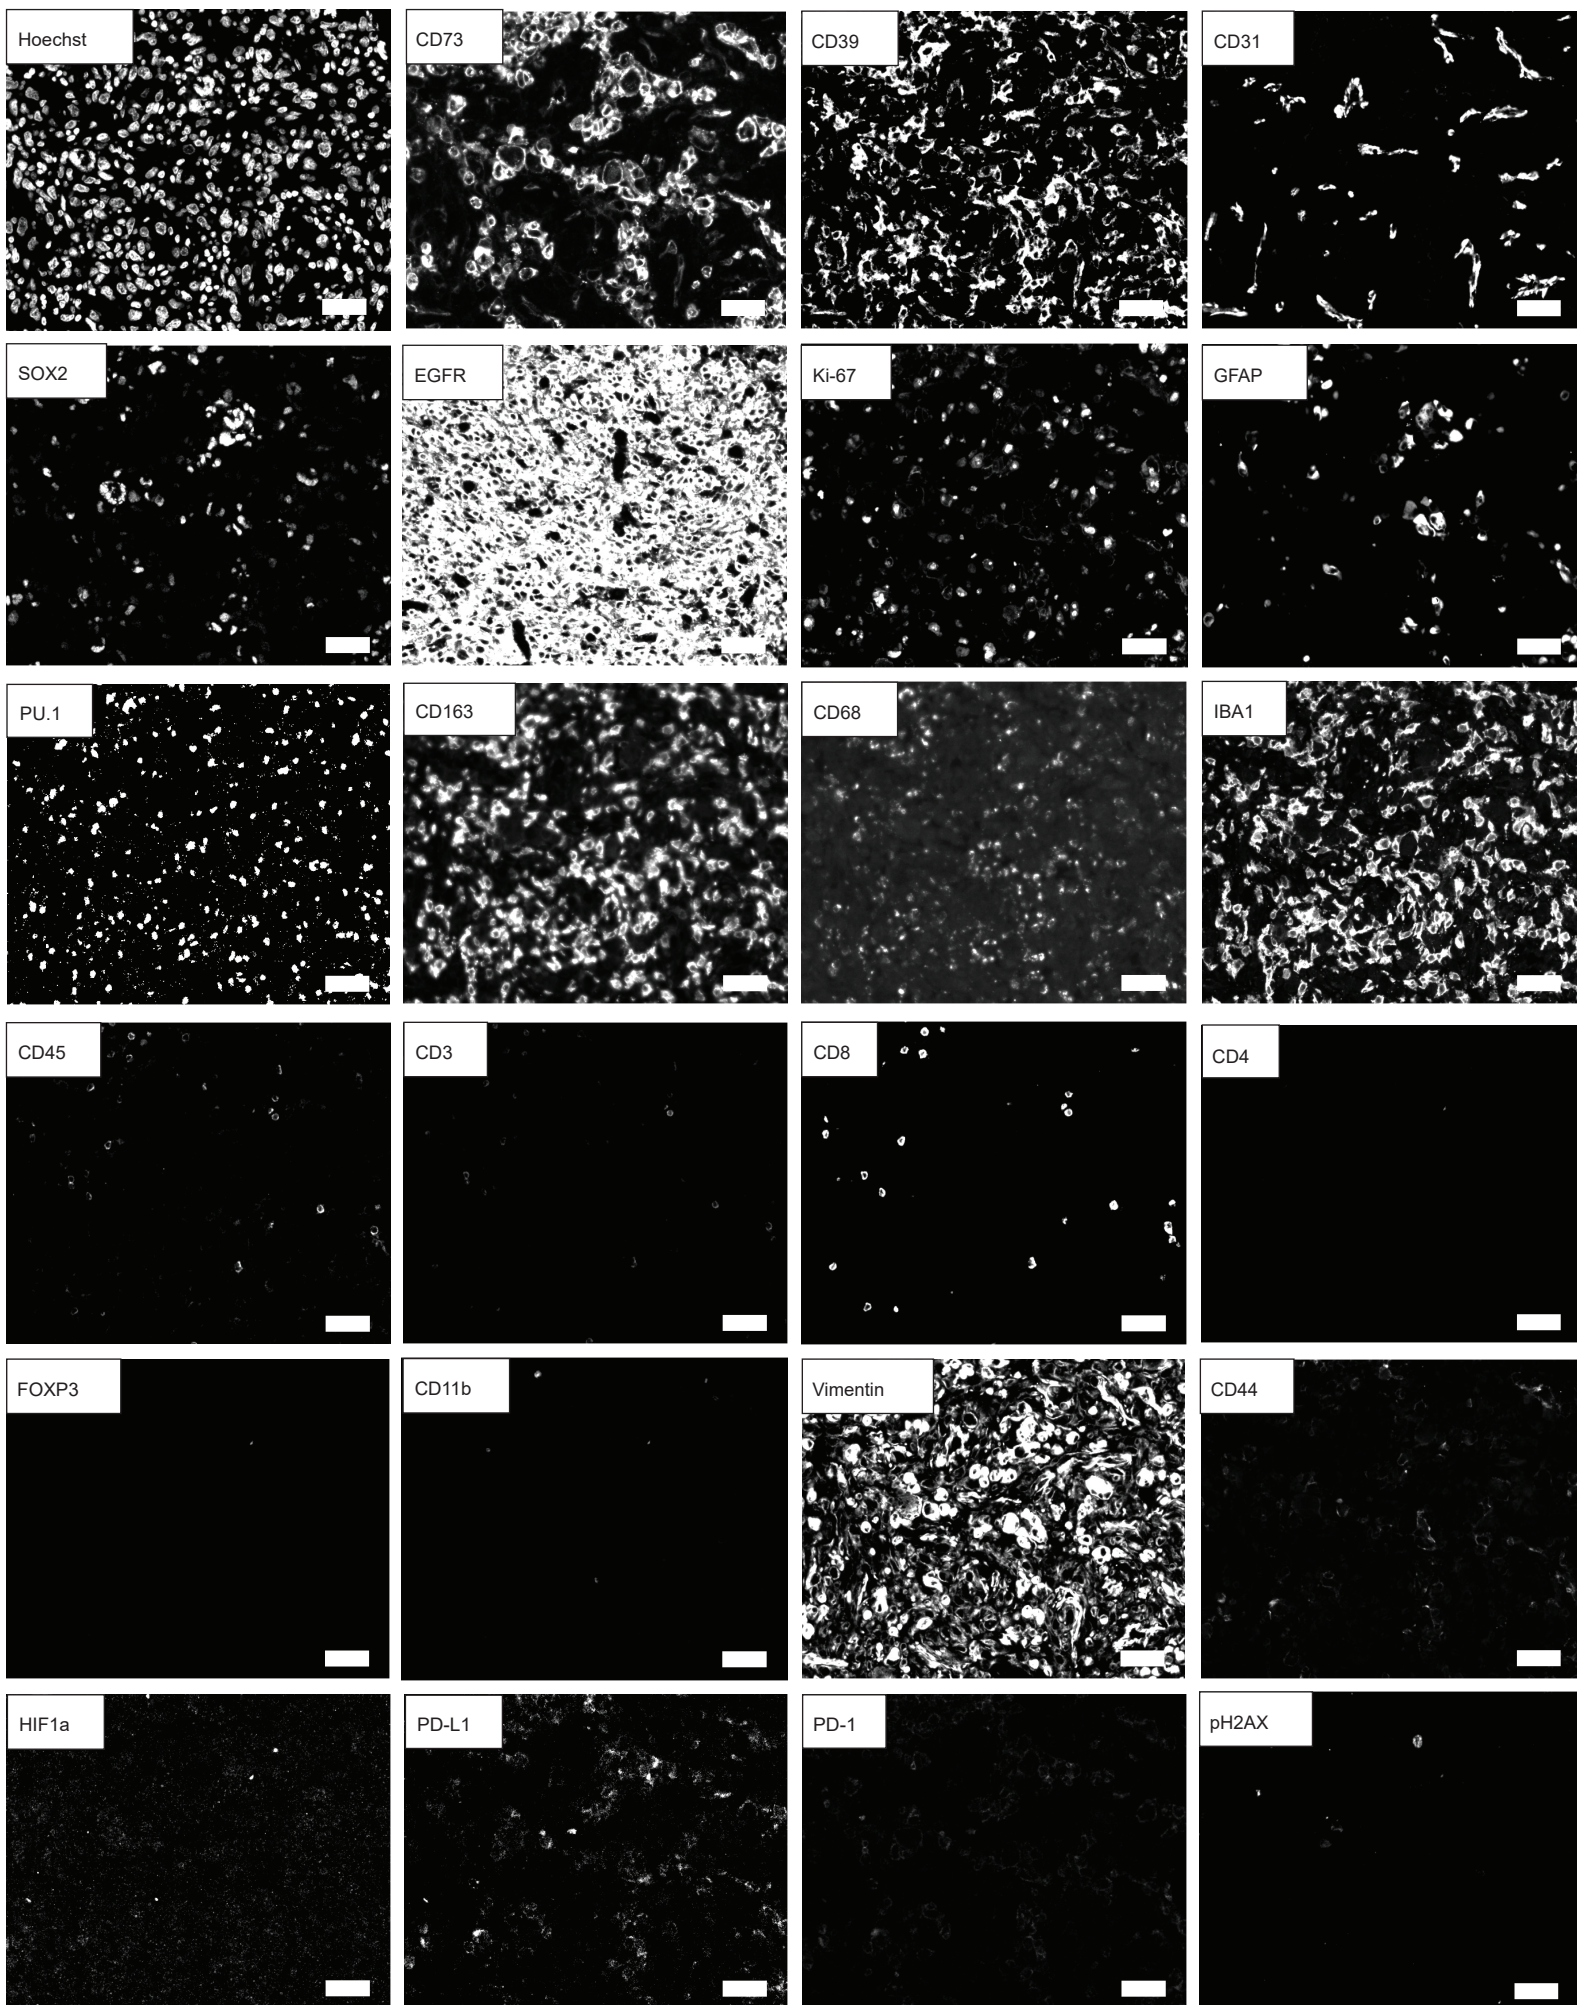

**Supplementary Figure 11.**

Tissue-based cyclic immunofluorescence (CyCIF) was performed on a tissue microarray (TMA) containing 172 IDH-WT glioblastoma specimens. Representative images of the same field from a glioblastoma specimen for each marker are shown, CyCIF was performed once on each specimen; scalebars: 50 $\mu$ m.



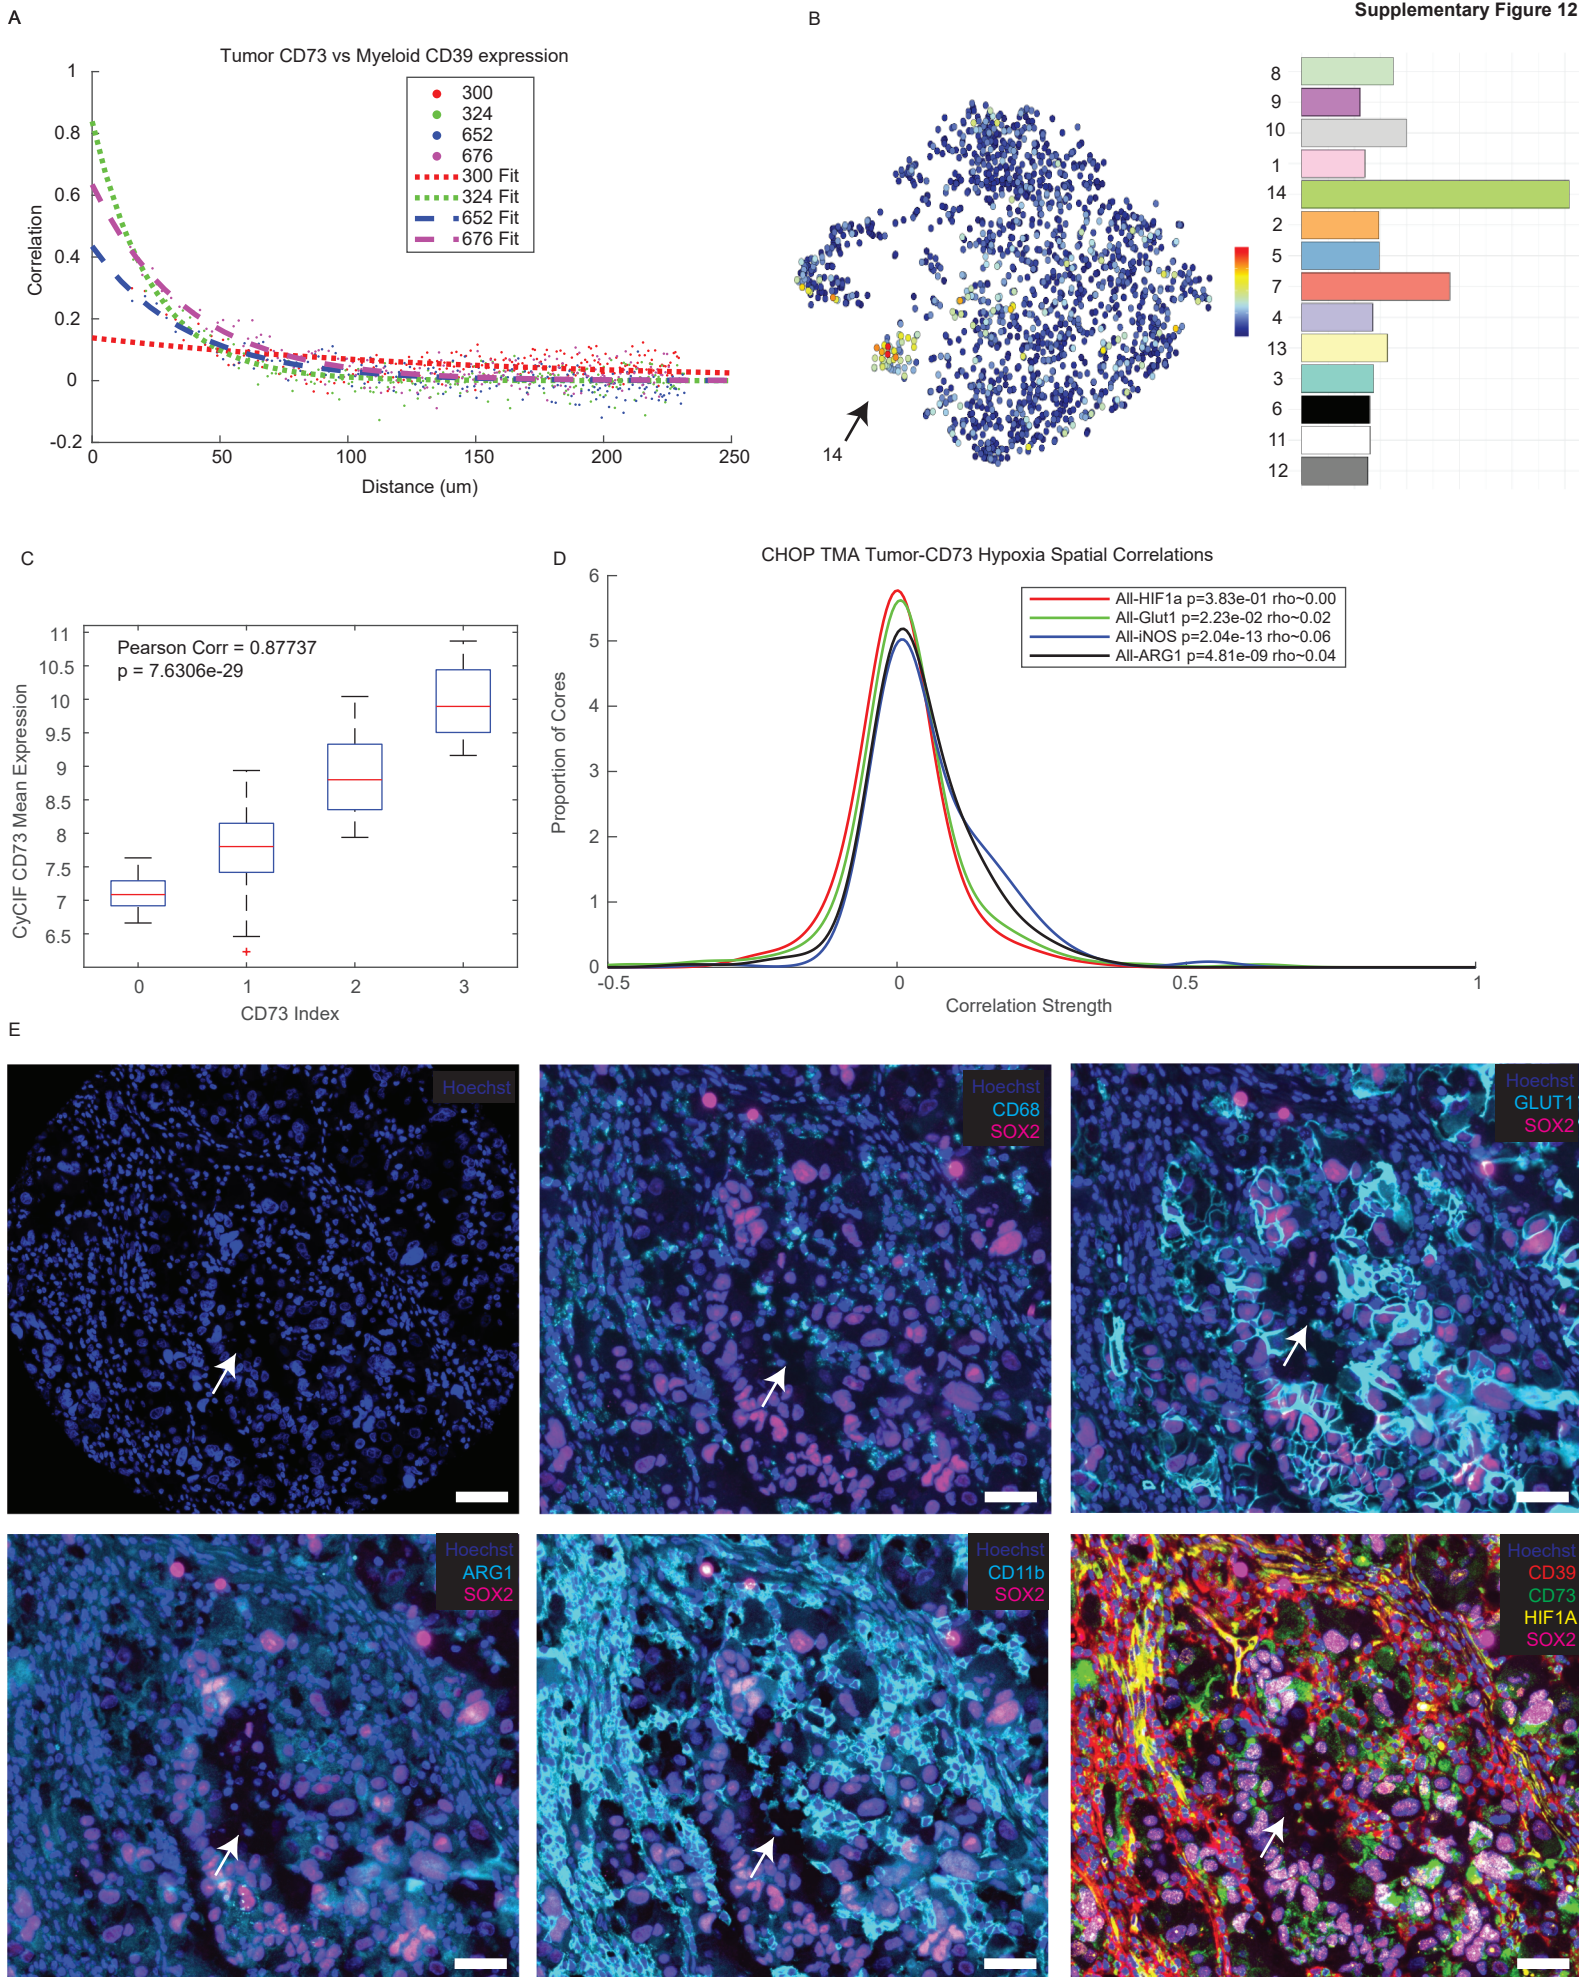

## Supplementary Figure 12.

(A) Spatial statistics correlation analysis of a representative glioblastoma specimen shows a strong spatial correlation between tumor CD73 and myeloid CD39 expression in a representative case. (B) Microglial sub-group analysis (Sankowski et al.<sup>52</sup>) of the myeloid group (CD39, CD11b, CD163) associated with tumor CD73 in IDH-WT glioblastoma shows that this signature strongly correlates with 'cluster 14', a group of glioma-associated microglia associated with inflammation and hypoxia signaling. (C) CD73 IHC score and mean CD73 intensity by CyCIF (all cells) were strongly correlated in the CBTTC pediatric glioma dataset (n=87 tissue cores,  $p=7.6e-29$ , Pearson's correlation test, unpaired, two-sided). (D) Spatial statistics analysis of the pediatric glioma dataset showed a significant correlation between tumor CD73 and hypoxia-responsive genes GLUT1 ( $p=2.23e-2$ ), iNOS ( $p=2.0e-13$ ), and ARG1 ( $p=4.8e-9$ ), but not HIF1A ( $p=0.38$ , Pearson's correlation tests, unpaired, two-sided). (E) Analysis of CyCIF staining showed that these markers are sometimes elevated in regions of strong tumor CD73 and myeloid CD39 co-localization, which may be associated with regions of palisading necrosis (**arrow**) (representative staining from a high-grade glioma specimen is shown, CyCIF was performed once on each specimen); scalebars: 50 $\mu$ m. (Figure S12C uses a Tukey box-and-whisker plot with midline = median, box limits = Q1(25<sup>th</sup> percentile)/Q3 (75<sup>th</sup> percentile), whiskers = 1.5 inter-quartile range (IQR), dots = outliers(>1.5IQR))

**Supplementary Table 1: Antibody Information**

| Target                                             | Clone #     | Vendor                                | Catalog #    | Dilution | RR_ID       |
|----------------------------------------------------|-------------|---------------------------------------|--------------|----------|-------------|
| anti-Arginase-1                                    | D4E3M       | Cell Signaling Technology             | 66297        | 1:100    | AB_2799705  |
| anti-CA IX                                         | H-11        | Santa Cruz Biotechnology              | sc-365900    | 1:100    | AB_10846466 |
| anti-CD11b                                         | C67F154     | eBioscience -Thermo Fisher Scientific | 53-0196-80   | 1:200    | AB_2637195  |
| anti-CD11b                                         | C67F154     | eBioscience -Thermo Fisher Scientific | 53-0196-82   | 1:100    | AB_2637195  |
| anti-CD14                                          | EPR3653     | Abcam                                 | ab196169     | 1:800    | AB_2890135  |
| anti-CD163                                         | EPR14643-36 | Abcam                                 | ab218293     | 1:100    | AB_2889155  |
| anti-CD206                                         | D-1         | Santa Cruz Biotechnology              | sc-376108    | 1:100    | AB_10987732 |
| anti-CD24                                          | SN3         | Abcam                                 | ab30350      | 1:200    | AB_726282   |
| anti-CD3                                           | CD3-12      | Abcam                                 | ab11089      | 1:500    | AB_2889189A |
| anti-CD31                                          | EPR3094     | Abcam                                 | ab218582     | 1:500    | AB_2857973  |
| anti-CD39                                          | EPR20627    | Abcam                                 | ab236038     | 1:100    | n/a         |
| anti-CD4                                           | N1UG0       | eBioscience -Thermo Fisher Scientific | 41-2444-82   | 1:100    | AB_2573602  |
| anti-CD40                                          | D8W3N       | Cell Signaling Technology             | 40868        | 1:100    | AB_2799188  |
| anti-CD44                                          | EPR1013Y    | Abcam                                 | ab194987     | 1:100    | n/a         |
| anti-CD44                                          | 156-3C11    | Cell Signaling Technology             | 8724         | 1:200    | AB_10829611 |
| anti-CD45                                          | HI30        | BioLegend                             | 304039       | 1:200    | AB_2562057  |
| anti-CD68                                          | D4B9C       | Cell Signaling Technology             | 79594S       | 1:200    | AB_2799935  |
| anti-CD73                                          | EPR6115     | Abcam                                 | ab124725     | 1:200    | AB_10976033 |
| anti-CD73                                          | EPR6114     | Abcam                                 | ab133582     | 1:200    | n/a         |
| anti-CD73                                          | 4G6E3       | Abcam                                 | ab202122     | 1:200    | AB_2858258  |
| anti-CD73                                          | D7F9A       | Cell Signaling Technology             |              | 1:200    | AB_2716625  |
| anti-CD8a                                          | AMC908      | eBioscience -Thermo Fisher Scientific | 50-0008-80   | 1:200    | AB_2574148  |
| anti-EGFR                                          | D38B1       | Cell Signaling Technology             | 5616         | 1:200    | AB_10691853 |
| anti-FOXO3A                                        | D19A7       | Cell Signaling Technology             | 14592        | 1:200    | AB_2798529  |
| anti-FOXP3                                         | 236A/E7     | eBioscience -Thermo Fisher Scientific | 41-4777-82   | 1:200    | AB_2573609  |
| anti-GFAP                                          | GA5         | eBioscience -Thermo Fisher Scientific | 41-9892-82   | 1:100    | AB_2573656  |
| anti-GLUT1                                         | EPR3915     | Abcam                                 | ab195020     | 1:100    | AB_2783877  |
| anti-HIF-1a                                        | D1S7W       | Cell Signaling Technology             | 52496        | 1:100    | AB_2799414  |
| anti-IBA1                                          | EPR6136(2)  | Abcam                                 | ab195031     | 1:500    | AB_2889157  |
| anti-iNOS                                          | EPR16635    | Abcam                                 | ab209594     | 1:100    | AB_2889252  |
| anti-Ki67                                          | D3B5        | Cell Signaling Technology             | 11882        | 1:400    | AB_2687824  |
| anti-MeCP2                                         | D4F3        | Cell Signaling Technology             | 34113        | 1:200    | AB_2799046  |
| anti-Mouse                                         |             | Invitrogen                            | A-21235      | 1:1000   | AB_2535804  |
| anti-NeuroD1                                       |             | Novus Biologicals                     | NBP2-98697   | 1:200    | n/a         |
| anti-Olig-2                                        |             | Millipore                             | AB9610-AF555 | 1:200    | AB_570666   |
| anti-p21/CDKN1a                                    | 12D1        | Cell Signaling Technology             | 8587         | 1:200    | AB_10892861 |
| anti-p53                                           | E26         | Abcam                                 | ab224942     | 1:400    | AB_2889206  |
| anti-PD1                                           | EPR4877(2)  | Abcam                                 | ab201825     | 1:200    | AB_2728811  |
| anti-PDGFRa                                        | D13C6       | Cell Signaling Technology             | 8893         | 1:200    | AB_2797679  |
| anti-PD-L1                                         | E1L3N       | Cell Signaling Technology             | 15005        | 1:200    | AB_2728832  |
| anti-pH2AX                                         | 2F3         | BioLegend                             | 613412       | 1:100    | AB_2616871  |
| anti-PU.1                                          | G148-74     | BD                                    | Biosciences  | 1:200    | AB_395335   |
| anti-PU.1                                          | 9G7         | Cell Signaling Technology             | 81886        | 1:100    | AB_2799984  |
| anti-Rabbit                                        |             | Invitrogen                            | A-11008      | 1:1000   | AB_143165   |
| anti-Rabbit (labelled polymer HRP) Envision System |             | Dako - Agilent                        | K4011        |          |             |
| anti-Rat                                           |             | Invitrogen                            | A-21434      | 1:1000   | AB_141733   |
| anti-SOX2                                          | EPR3131     | Abcam                                 | ab196637     | 1:100    | n/a         |
| anti-SOX2                                          | D6D9        | Cell Signaling Technology             | 5179         | 1:200    | AB_10828439 |
| anti-Survivin                                      | 71G4B7      | Cell Signaling Technology             | 2810         | 1:200    | AB_10691462 |
