# Supplementary material for: Single cell spatial analysis reveals the topology of immunomodulatory purinergic signaling in glioblastoma
Source: PubMed Central journal article supplement (PMC9381513; doi:10.1038/s41467-022-32430-w), 2022-08-16
Supplement: 41467_2022_32430_MOESM3_ESM.pdf [file 41467_2022_32430_MOESM3_ESM.pdf]

## Description of Additional Supplementary Data Files

**File Name: Supplementary Data 1**

**Description:** Immune cell lineage gene signatures used to analyze the tumor-immune microenvironment in glioblastoma.

**File Name: Supplementary Data 2**

**Description:** Inflammatory pathway gene signatures used to analyze the tumor-immune microenvironment in glioblastoma.

**File Name: Supplementary Data 3**

**Description:** Comparison of *CD73* bulk mRNA expression in glioblastoma compared to other tumor subtypes in The Cancer Genome Atlas (TCGA) Pan-Cancer Atlas dataset.

**File Name: Supplementary Data 4**

**Description:** Comparison of *ADORA1-3* and *ENTPD1/CD39* bulk mRNA expression in glioblastoma compared to other cancer subtypes in The Cancer Genome Atlas (TCGA) Pan-Cancer Atlas dataset.

**File Name: Supplementary Data 5**

**Description:** Demographic data for CNS tumors in the CD73 immunohistochemistry analysis

**File Name: Supplementary Data 6**

**Description:** CD73 expression in medulloblastoma stratified by histologic and molecular subtype

**File Name: Supplementary Data 7**

**Description:** CD73 expression by histologic region in adamantinomatous and papillary craniopharyngioma.

**File Name: Supplementary Data 8**

**Description:** CD73 expression in meningioma stratified by histologic subtype and W.H.O. grade.

**File Name: Supplementary Data 9**

**Description:** CD73 expression in CNS tumors stratified by recurrence status

**File Name: Supplementary Data 10**

**Description:** CD73 expression in IDH-wildtype glioblastoma stratified by *MGMT* promoter methylation status

**File Name: Supplementary Data 11**

**Description:** Metabolite standards used in the mass spectrometry analysis of glioblastoma

**File Name: Supplementary Data 12**

**Description:** Table of contents for the Source Data file, with the location of data for each figure panel in the manuscript.
